# Supplementary material for: Incidence of SARS-CoV-2 reinfection in a paediatric cohort in Kuwait
Source: PubMed Central journal article supplement — BMJ Open. 2022 Jun 27;12(6):e056371. doi: 10.1136/bmjopen-2021-056371 (PMC9240452; doi:10.1136/bmjopen-2021-056371), 2022-06-27
Supplement: bmjopen-2021-056371.draft_revisions.pdf [file bmjopen-2021-056371.draft_revisions.pdf]

# BMJ Open

BMJ Open is committed to open peer review. As part of this commitment we make the peer review history of every article we publish publicly available.

When an article is published we post the peer reviewers' comments and the authors' responses online. We also post the versions of the paper that were used during peer review. These are the versions that the peer review comments apply to.

The versions of the paper that follow are the versions that were submitted during the peer review process. They are not the versions of record or the final published versions. They should not be cited or distributed as the published version of this manuscript.

BMJ Open is an open access journal and the full, final, typeset and author-corrected version of record of the manuscript is available on our site with no access controls, subscription charges or pay-per-view fees (<http://bmjopen.bmj.com>).

If you have any questions on BMJ Open's open peer review process please email [info.bmjopen@bmj.com](mailto:info.bmjopen@bmj.com)

# BMJ Open

## Epidemiology of Potential SARS-CoV-2 Reinfection in a Pediatric Cohort in Kuwait

|                               |                                                                                                                                                                                                                                                                                                                                                                                                                                                                                                                                                                                                                          |
|-------------------------------|--------------------------------------------------------------------------------------------------------------------------------------------------------------------------------------------------------------------------------------------------------------------------------------------------------------------------------------------------------------------------------------------------------------------------------------------------------------------------------------------------------------------------------------------------------------------------------------------------------------------------|
| Journal:                      | <i>BMJ Open</i>                                                                                                                                                                                                                                                                                                                                                                                                                                                                                                                                                                                                          |
| Manuscript ID                 | bmjopen-2021-056371                                                                                                                                                                                                                                                                                                                                                                                                                                                                                                                                                                                                      |
| Article Type:                 | Original research                                                                                                                                                                                                                                                                                                                                                                                                                                                                                                                                                                                                        |
| Date Submitted by the Author: | 23-Aug-2021                                                                                                                                                                                                                                                                                                                                                                                                                                                                                                                                                                                                              |
| Complete List of Authors:     | Alhaddad, Fatemah; Farwaniya Hospital, Department of Pediatrics<br>Abdulkareem, Ali; Farwaniya Hospital, Department of Pediatrics<br>Alsharrah, Danah; Farwaniya Hospital, Pediatrics<br>Alkandari, Abdullah; Dasman Diabetes Institute,<br>Bin-Hasan, Saadoun ; Farwaniya Hospital, Department of Pediatrics;<br>Dasman Diabetes Institute<br>Al-Ahmad, Mona; Kuwait University Faculty of Medicine, Department of<br>Microbiology<br>Al Hashemi, Hashem ; Farwaniya Hospital, Department of Pediatrics<br>Alghounaim, Mohammed; Amiri Hospital, Pediatric Infectious Diseases<br>Specialist and Medical Microbiologist |
| Keywords:                     | COVID-19, Epidemiology < INFECTIOUS DISEASES, PAEDIATRICS                                                                                                                                                                                                                                                                                                                                                                                                                                                                                                                                                                |
|                               |                                                                                                                                                                                                                                                                                                                                                                                                                                                                                                                                                                                                                          |

SCHOLARONE™  
Manuscripts

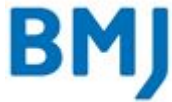

I, the Submitting Author has the right to grant and does grant on behalf of all authors of the Work (as defined in the below author licence), an exclusive licence and/or a non-exclusive licence for contributions from authors who are: i) UK Crown employees; ii) where BMJ has agreed a CC-BY licence shall apply, and/or iii) in accordance with the terms applicable for US Federal Government officers or employees acting as part of their official duties; on a worldwide, perpetual, irrevocable, royalty-free basis to BMJ Publishing Group Ltd ("BMJ") its licensees and where the relevant Journal is co-owned by BMJ to the co-owners of the Journal, to publish the Work in this journal and any other BMJ products and to exploit all rights, as set out in our [licence](#).

The Submitting Author accepts and understands that any supply made under these terms is made by BMJ to the Submitting Author unless you are acting as an employee on behalf of your employer or a postgraduate student of an affiliated institution which is paying any applicable article publishing charge ("APC") for Open Access articles. Where the Submitting Author wishes to make the Work available on an Open Access basis (and intends to pay the relevant APC), the terms of reuse of such Open Access shall be governed by a Creative Commons licence – details of these licences and which [Creative Commons](#) licence will apply to this Work are set out in our licence referred to above.

Other than as permitted in any relevant BMJ Author's Self Archiving Policies, I confirm this Work has not been accepted for publication elsewhere, is not being considered for publication elsewhere and does not duplicate material already published. I confirm all authors consent to publication of this Work and authorise the granting of this licence.

## Epidemiology of Potential SARS-CoV-2 Reinfection in a Pediatric Cohort in Kuwait

Fatemah Alhaddad<sup>1</sup>, MD, Ali Abdulkareem<sup>1</sup>, MD, Danah Alsharrah<sup>1</sup>, MD, Abdullah Alkandari<sup>2</sup>, PhD, Saadoun Bin-Hasan<sup>1,2</sup>, MD, Mona Al-Ahmad<sup>3</sup>, MD, Hashem Al Hashemi<sup>1</sup>, MD, Mohammad Alghounaim<sup>4</sup>, MD

<sup>1</sup>Department of Pediatrics, Farwaniyah Hospital, Ministry of Health, Sabah Al-Nasser, Kuwait

<sup>2</sup> Department of Population Health, Dasman Diabetes Institute, Kuwait City, Kuwait

<sup>3</sup> Department of Microbiology, Faculty of Medicine, Kuwait University, Kuwait

<sup>4</sup>Department of Pediatrics, Amiri Hospital, Ministry of Health, Kuwait City, Kuwait

**Keywords:** Children, SARS-CoV-2, COVID-19, reinfection, epidemiology

**Running title:** SARS-CoV-2 Reinfection in Children.

**Conflict of Interest Disclosures:** The authors no conflicts of interest to disclose

**Funding:** None

### Abbreviations:

COVID-19: Coronavirus disease 2019

SARS-CoV-2: Severe acute respiratory syndrome-related coronavirus 2

PCR-Q8: The Pediatric COVID Registry in Kuwait

WHO: World Health Organization.

PCR: polymerase chain reaction

IQR: interquartile range

**Article summary:** National-level study found that pediatric SARS-CoV-2 reinfection is uncommon, and estimated to be 1.02 (95% CI 0.71-1.45) infection per 100,000 person-days

1  
2  
3  
4  
5  
6  
7  
8  
9  
10  
11  
12  
13  
14  
15  
16  
17  
18  
19  
20  
21  
22  
23  
24  
25  
26  
27  
28  
29  
30  
31  
32  
33  
34  
35  
36  
37  
38  
39  
40  
41  
42  
43  
44  
45  
46  
47  
48  
49  
50  
51  
52  
53  
54  
55  
56  
57  
58  
59  
60

26 **Corresponding author:**  
27 Dr. Mohammad Alghounaim  
28 Department of Pediatrics  
29 Amiri Hospital  
30 900005 Ibn Misbah St. Sharq block 3  
31 Kuwait City, Kuwait  
32 Tel: +965-97333099  
33 Fax: +965-22436149  
34 E-mail: malghounaim@moh.gov.kw

For peer review only

1  
2 38 **Contributors' Statement:**  
3

4 39  
5

6 40 **Drs Ali Abdulkareem, Danah Alsharrah, and Fatemah Alhaddad** conceptualized and designed  
7  
8  
9 41 the study, curated the data, wrote the original draft of the paper, and revised the manuscript.  
10

11 42 **Dr Abdullah Alkandari** conducted the formal analysis, and critically revised the manuscript  
12

13 43 **Dr Saadoun Bin-Hasan:** conceptualized and designed the study, and critically revised the  
14  
15  
16 44 manuscript.  
17

18 45 **Drs Mona Al-Ahmad and Hashem Al-Hashemi:** conceptualized the study, participated in data  
19  
20 46 curation, and revised the manuscript  
21

22 47 **Mohammed Alghounaim:** conceptualized and designed the study, supervised data collection,  
23  
24  
25 48 conducted initial analysis, and critically revised the manuscript.  
26  
27

28 49 All authors approved the final manuscript as submitted and agree to be accountable for all aspects  
29  
30 50 of the work.  
31  
32  
33

34 51  
35

36 52  
37  
38  
39  
40  
41  
42  
43  
44  
45  
46  
47  
48  
49  
50  
51  
52  
53  
54  
55  
56  
57  
58  
59  
60

1  
2 53 **Abstract**

3  
4 54

5  
6  
7 55 **Objective:** Subsequent protection from Severe acute respiratory syndrome-related coronavirus 2  
8  
9 56 (SARS-COV-2) infection in pediatrics is not well reported in the literature. We aimed to describe  
10  
11 57 the clinical characteristics and dynamics of SARS-CoV-2 PCR repositivity in children.

12  
13  
14 58

15  
16 59 **Methods:** This is a population-level retrospective cohort study included children 12 years and  
17  
18 60 younger between February 28, 2020 and March 6, 2021. Patients were identified through multiple  
19  
20 61 national-level electronic coronavirus disease 2019 (COVID-19) databases. SARS-CoV-2  
21  
22 62 reinfection was defined as having two or more positive SARS-CoV-2 PCR done on a respiratory  
23  
24 63 sample, at least 45 days apart. Clinical data was obtained from the Pediatric COVID-19 Registry in  
25  
26 64 Kuwait (PCR-Q8). Descriptive statistics and incidence-sensitivity analyses were performed.

27  
28  
29  
30 65

31  
32 66 **Results:** Thirty pediatric COVID-19 patients had SARS-CoV-2 reinfection at an incidence of 1.02  
33  
34 67 (95% CI 0.71-1.45) infection per 100,000 person-days and a median time to reinfection of 83 days  
35  
36 68 (IQR 62-128.75). The incidence of reinfection decreased to 0.78 (95% CI 0.52-1.17) and 0.47 (95%  
37  
38 69 CI 0.28-0.79) per person-days when the minimum interval between PCR repositivity was increased  
40  
41 70 to 60 and 90 days, respectively. The mean age of reinfected subjects was 8.5 years (IQR 3.7-10.3)  
42  
43 71 and majority (70%) were female. Most children (55.2%) had asymptomatic reinfection. Fever was  
44  
45 72 the most common presentation in symptomatic patients. One immunocompromised experienced two  
46  
47 73 reinfection episodes.

48  
49  
50 74

51  
52  
53 75 **Conclusion:** SARS-CoV-2 reinfection is uncommon in children. Previous confirmed COVID-19 in  
54  
55 76 children seems to induce a protective immunity against future infections.

56  
57 77

58  
59  
60 78

1  
2  
3  
4  
5  
6  
7  
8  
9  
10  
11  
12  
13  
14  
15  
16  
17  
18  
19  
20  
21  
22  
23  
24  
25  
26  
27  
28  
29  
30  
31  
32  
33  
34  
35  
36  
37  
38  
39  
40  
41  
42  
43  
44  
45  
46  
47  
48  
49  
50  
51  
52  
53  
54  
55  
56  
57  
58  
59  
60

79 **Strength and limitations of the study**

- 80 - Little is known about the risk of pediatric SARS-CoV-2 reinfection and children are more
- 81 likely to be asymptomatic and therefore not all positive cases are detected.
- 82 - Estimating the duration of immunity after the primary infection is crucial in planning health
- 83 care measures
- 84 - A population-level retrospective cohort study included children 12 years and younger was
- 85 performed and included SARS-CoV-2 reinfection and descriptive statistics were performed.

For peer review only



1  
2 87 **Introduction:**

3  
4 88 Severe acute respiratory syndrome-related coronavirus 2 (SARS-CoV-2) is a  
5  
6 89 novel beta coronavirus that was first described in December 2019 and resulted in a pandemic of  
7  
8  
9 90 respiratory illness, coronavirus disease-2019 (COVID-19) <sup>1</sup>. By early May 2021, the pandemic has  
10  
11 91 resulted in over 150 million cases worldwide and more than three million deaths reported by the  
12  
13 92 World Health Organization (WHO)<sup>2</sup>. Despite the widespread of COVID-19, children compromised  
14  
15 93 less than 15% of all reported cases <sup>3-5</sup>. Limited social interactions, and enhanced infection control  
16  
17 94 measures such as school closure and online teaching, may have contributed to lower proportions of  
18  
19 95 infected children <sup>6</sup>. In addition, children are more likely to have asymptomatic or mild infection  
20  
21 96 compared to adults and, therefore, may not be tested <sup>7</sup>.  
22  
23  
24  
25  
26

27 98 Quantifying the duration of natural immunity after the primary SARS-CoV-2 infection has  
28  
29 99 been crucial to address public health measures, to help predict the continuity of the pandemic, and  
30  
31  
32 100 to understand the effect of reinfection on disease severity. The first case of SARS-CoV-2  
33  
34 101 reinfection was reported in August 2020 <sup>8</sup>. Since then, interest in the exact risk and rate of  
35  
36 102 reinfection has been increasing. Several reports estimated that reinfection occurs in less than 1% of  
37  
38  
39 103 previously infected individuals <sup>9-11</sup>. The duration between primary and secondary infection was  
40  
41 104 reported to vary from 48 to 124 days in the first documented cases in literature <sup>12, 13</sup>. However, most  
42  
43 105 of the reinfection studies focused mainly on the adult population. COVID-19 follows different  
44  
45 106 disease dynamics in children, and studies addressing reinfection in this population are lacking.  
46  
47  
48  
49

50 108 The first pediatric case of COVID-19 in Kuwait was identified in February 2020 <sup>7</sup>. Since  
51  
52 109 then, schools and daycare centers were closed, and classes were conducted virtually. In addition,  
53  
54  
55 110 commercial centers, gyms, and restaurants were open but with time restrictions and strict protective  
56  
57 111 measures. Early in the pandemic, a national electronic COVID-19 testing database was created and  
58  
59 112 included all SARS-CoV-2 test results of symptomatic individuals, contact tracing, and routine  
60

1  
2 113 travel or hospitalization screening. Also, a national Pediatric COVID-19 Registry (PCR-Q8) was  
3  
4 114 established for children aged 12 years and younger to better understand disease dynamics and  
5  
6 115 update management protocols. This created the unique opportunity to investigate the possibility of  
7  
8  
9 116 reinfection with SARS-CoV-2, with an attempt to establish an average duration between the two  
10  
11 117 positive results, potential factors linked to reinfection, and its clinical severity.  
12

### 13 118 14 15 16 119 17 18 120 **Methods:**

19  
20 121 A population-level retrospective cohort study was conducted in Kuwait between February  
21  
22 122 28<sup>th</sup>, 2020, and March 6<sup>th</sup>, 2021. The national COVID-19 test result database was used to identify  
23  
24 123 children younger than 12 years and had two or more subsequent positive SARS-CoV-2 polymerase  
25  
26 124 chain reaction (PCR) tests done on a respiratory sample, at least 45 days apart. Subjects who had  
27  
28 125 two or more positive SARS-CoV-2 PCR but less than 45 days in-between, and patients who  
29  
30 126 fulfilled the WHO definition of the multisystem inflammatory syndrome in children (MIS-C) were  
31  
32 127 excluded<sup>14</sup>.  
33  
34  
35  
36 128

37  
38  
39 129 To assure the inclusion of all SARS-CoV-2 infected children into this study, the national  
40  
41 130 COVID-19 testing database was used for initial patient identification. This database includes the  
42  
43 131 results for all individuals who had SARS-CoV-2 PCR done on a respiratory specimen nationwide.  
44  
45 132 SARS-CoV-2 PCR is typically done to confirm the diagnosis of symptomatic individuals, detect  
46  
47 133 secondary infections in contact tracing, and identify infected subjects prior to hospitalization or  
48  
49 134 travel. During the study period, the SARS-CoV-2 antigen was not routinely performed on pediatric  
50  
51 135 samples. Also, serum SARS-CoV-2 IgG or IgM tests were not routinely done to confirm current or  
52  
53 136 prior infection. A secondary search query was done on the PCR-Q8 registry, which included patient  
54  
55 137 information from the following sources: hospital records, institutional quarantine centers, patient  
56  
57 138 transport units, as well as all laboratories that provide SARS-CoV-2 PCR.  
58  
59  
60

1

2 139

3

4 140

The PCR-Q8 registry retrospectively collected detailed individual-level demographic,

laboratory and clinical characteristics of all children diagnosed with COVID-19 in Kuwait. The

database was acquired to obtain demographic and clinical data. COVID-19 severity was categorized

based on WHO disease classification<sup>15</sup>. Infected children with mild or asymptomatic COVID-19

may not require hospitalization hence, clinical data in the registry may be lacking. For those

subjected, parents were contacted to complete missing disease-related data.

17

18 146

19

Descriptive analysis was performed to compare between primary and secondary infections.

To calculate incidence and to account for delayed presentation of reinfection, calculated days at risk

included the period from the day of first positive SARS-CoV-2 PCR starting February 28<sup>th</sup>, 2020 to

the second positive test or March 6<sup>th</sup>, 2021, whichever is first. However, individuals with the first

positive SARS-CoV-2 PCR starting January 1<sup>st</sup>, 2021, were not included in the calculation due to

limited time for reinfection to occur. Clopper-Pearson test was used to calculate the 95% CI.

Analysis was done using GraphPad Prism (v. 9.0). Also, sensitivity analysis assessing the clinical

presentation and incidence of reinfection considering a minimum interval for PCR repositivity of 60

and 90 days.

40

41 156

42

43 157

44

#### 45 158 **Ethics:**

46 159 The study was approved by the ethical board of the Ministry of Health, Kuwait (reference no.

47 160 1607/2020). Verbal consent was obtained from parents who agreed to participate to complete

48 161 missing clinical data.

54

55 162

56

57

58

59

60

## Results

During the study period, there were 14,320 documented SARS-CoV-2 infections in children younger than 12 years in Kuwait, accounting for 2,954,372 person-days of follow-up. Among those, 421 children with repeat positive SARS-CoV-2 PCR were identified, of which, 30 patients had a repeat positive SARS-CoV-2 45 days or more after the first positive, 391 patients had their repeat test within 45 days and were excluded (figure 1). The incidence of reinfection was 1.02 (95% CI 0.71-1.45) infection per 100,000 previously infected person-days. The mean age of the reinfection cohort was 8.5 (IQR 3.7-10.3) years and majority (70%) were females (table 1). More than half (56.6%) of reinfection patients were not known to have any chronic comorbid conditions at the time of the first or second infection.

The median time between the two episodes of infection as evident by the sample collection date was 83 days (IQR 62-128.75 days) (figure 2). Majority of the patients had asymptomatic infection during the first and second episodes, 43.3% and 53.3% respectively (table 2). In symptomatic patients, fever, cough and shortness of breath were the most commonly reported symptoms. One (3.3%) patient had severe pneumonia during the first infection, whereas, four (13.3%) patients had severe pneumonia during second infection. Of those, three patients had mild or asymptomatic initial SARS-CoV-2 infection. One of the four patients was admitted for an acute exacerbation of asthma with three days history of fever. The median length of hospitalization was 9 days (IQR 5.75-13 days) and 6 days (IQR 3.75-6.75 days) for the first and second infection, respectively. None of the subjects received care in an intensive care unit.

One female patient previously diagnosed with hypereosinophilic syndrome on low-dose prednisone, had three episodes of SARS-CoV-2 infections. Her first infection was in July 2020 where she was admitted for 10 days as a case of severe pneumonia followed by two negative PCR tests done in August. Her second infection was in November 2020 when she was also admitted for

1  
2 189 severe pneumonia with prolonged hospital admission followed by a negative PCR test done in  
3  
4 190 December. Interestingly, during her third infection in January 2021, she was asymptomatic and  
5  
6 191 testing was done for screening before an outpatient appointment.  
7  
8

9 192

10  
11 193           Around half (46.6%) of reinfections occurred more than 90 days after the initial infection.

12  
13 194 The incidence of reinfection decreased to 0.78 (95% CI 0.52-1.17) and 0.47 (95% CI 0.28-0.79) per  
14  
15 195 infected person-days when the minimum acceptable duration between PCR repositivity was  
16  
17 196 increased to 60 and 90 days, respectively. Also, there were more symptomatic children (64.3%)  
18  
19 197 during the second infection using the 90-day definition when compared to the 45-day or 60-day  
20  
21 198 minimum interval.  
22  
23  
24

25 199

26

27 200

28

29

30

31

32

33

34

35

36

37

38

39

40

41

42

43

44

45

46

47

48

49

50

51

52

53

54

55

56

57

58

59

60

## Discussion

The exact risk and factors associated with SARS-CoV-2 reinfection in the pediatric population are still not well understood. We found that a second SARS-CoV-2 infection is uncommon in children with a rate of 1.02 reinfection per 100,000 previously infected person-days and a median time to reinfection of 83 days. The finding of this study is similar to previous reports which showed a reinfection incidence in adults of 0.09-0.13 per 10,000 person-day<sup>9,11</sup>. Similarly, in a large Danish cohort, prior SARS-CoV-2 provided on average 80.5% protection against repeat infection. The estimated protection differed between different age groups ranging from 47.1% in individuals older than 65 years of age to 82.7% in younger subjects<sup>16</sup>. However, the epidemiology and disease dynamics of SARS-CoV-2 infection are different in children<sup>17</sup>. Therefore, using data generated from adult studies to infer on the pediatric population may not be accurate.

Magnitude and persistence of immunological responses conferred by SARS-CoV-2 infection can be variable based on age and medical comorbidities<sup>18</sup>. Hence, estimating the duration of protective immunity after acquiring SARS-CoV-2 infection has been the focus of several studies. In an adult study, looking at the neutralizing antibodies, the seropositivity was identified in all participants up to 53 days after infection<sup>19</sup>. However, the level of neutralizing antibodies varies greatly with disease severity and tend to wane over time<sup>20,21</sup>. Few studies compared humoral responses between adults and children. Weisberg et. al. have shown that children exhibit lower antibody response compared to adults<sup>22</sup>. However, the incidence of reinfections observed in this study was similar to previously reported adult patients.

A standard definition of SARS-CoV-2 reinfection is lacking. Traditionally, the detection of viable virus by cell culture has been the standard to ascertain active infection<sup>23</sup>. However, this testing method lacks sensitivity and is time consuming<sup>24</sup>. In addition, due to the need of expertise

1  
2 227 and appropriate laboratory infrastructure, routine population-level testing using cell culture in not  
3  
4 228 possible. For these reasons, the detection of genetically distinct SARS-CoV-2 in different infectious  
5  
6 229 episodes or the use of the cycle threshold (Ct) value as a surrogate for viral load has been suggested  
7  
8  
9 230 <sup>12, 13</sup>. In Kuwait, genomic testing capacity is limited and retrieving patients' samples and laboratory  
10  
11 231 data from several public and private laboratories was logistically challenging. In our study, a 45-day  
12  
13 232 period between two-consecutive positive PCR test was selected based on the expected duration of  
14  
15 233 molecular test positivity on a respiratory sample. Alsharrah et al. reported a median duration of  
16  
17  
18 234 PCR positivity among pediatric COVID-19 patients of 15 days, with maximum duration of 42 days  
19  
20 235 <sup>7</sup>.

21  
22  
23 236  
24  
25 237 To our knowledge, this is the first national-level cohort that estimates the risk of pediatric  
26  
27 238 SARS-CoV-2 reinfection. Nevertheless, this study has some limitations. Due to limited genomic  
28  
29  
30 239 sequencing capacity, proving that PCR repositivity was caused by a genetically distinct virus was  
31  
32 240 not possible. However, based on the expected duration of PCR-persistence in children mentioned  
33  
34 241 above, one will not expect that PCR done on an upper respiratory specimen to remain positive  
35  
36 242 beyond 45 days. Another limitation was the unavailability of some data recorded in the national  
37  
38  
39 243 pediatric COVID-19 registry. When data was missing, parents were contacted via the telephone,  
40  
41 244 creating a recall bias. In addition, patients with mild upper respiratory tracts symptoms are  
42  
43 245 underreported by parents. Therefore, mild cases are less likely to be tested and can be missed, and  
44  
45  
46 246 underestimate the reinfection rate. However, using the national level electronic record allowed the  
47  
48 247 collection of data from variable sources and the detection of asymptotically infected  
49  
50 248 children. Despite these limitations, this study has shown that reinfection is generally uncommon.  
51  
52  
53 249 Further studies that correlate degree of humoral and cellular immunity, along with wide genomic  
54  
55 250 sequencing surveillance with risk of reinfection are needed to better understand and quantify the  
56  
57 251 risk of repeat SARS-CoV-2 infection.  
58  
59 252  
60

1  
2 253 **Acknowledgement:**  
3

4 254 We would like to thank Dr. Hessa Alkandari, chair of the pediatric council in the Ministry of  
5  
6 255 Health, Kuwait, for her help in preparing this manuscript. We also thank the research group of the  
7  
8  
9 256 Pediatric COVID-19 Registry in Kuwait (PCR-Q8) for their contribution.  
10

11 257  
12  
13  
14  
15  
16  
17  
18  
19  
20  
21  
22  
23  
24  
25  
26  
27  
28  
29  
30  
31  
32  
33  
34  
35  
36  
37  
38  
39  
40  
41  
42  
43  
44  
45  
46  
47  
48  
49  
50  
51  
52  
53  
54  
55  
56  
57  
58  
59  
60

For peer review only



1  
2 258 **Table 1.** Demographic characteristics of the study population

3  
4 259

5

6

7

8

9

10

11

12

13

14

15

16

17

18

19

20

21

22

23

24

25

26

27

28

29

30

31

32

33

34

35

36

37

38

39

40

41

42

43

44

45

46

47

48

49

50

51

52

53

54

55

56

57

58

59

60

| Variable                                                    | Population<br>(n=30) |
|-------------------------------------------------------------|----------------------|
| <b>Age [median, IQR]</b>                                    | 8.6 years [3.7-10.3] |
| <b>Male</b>                                                 | 9 (30%)              |
| <b>Comorbid conditions</b>                                  |                      |
| Asthma                                                      | 2 (6.7%)             |
| Diabetes                                                    | 1 (3.3%)             |
| Healthy                                                     | 17 (56.7%)           |
| Neurological disease                                        | 3 (10%)              |
| Other                                                       | 5 (16.7%)            |
| Preterm                                                     | 1 (3.3%)             |
| <b>Time between 2 episodes</b>                              |                      |
| First positive PCR to reinfection [median, IQR]             | 83 days [62-128.75]  |
| Symptom onset of first episode to reinfection [median, IQR] | 83 days [62.5-130.5] |

260

IQR, interquartile range.

**Table 2.** Clinical characteristics of the study population based on different defined intervals of polymerase chain reaction (PCR) repositivity

| Variable                                | First Infection                      |                          |                        | Second Infection                     |                      |                      |
|-----------------------------------------|--------------------------------------|--------------------------|------------------------|--------------------------------------|----------------------|----------------------|
|                                         | Minimum interval of PCR repositivity |                          |                        | Minimum interval of PCR repositivity |                      |                      |
|                                         | 45 days<br>(n=30)                    | 60 days<br>(n=23)        | 90 days<br>(n=14)      | 45 days<br>(n=29)*                   | 60 days<br>(n=23)    | 90 days<br>(n=14)    |
| <b>Disease severity</b>                 |                                      |                          |                        |                                      |                      |                      |
| Asymptomatic                            | 13 (43.3%)                           | 12 (52.2%)               | 8 (57.1%)              | 16 (55.2%)                           | 12 (52.2%)           | 5 (35.7%)            |
| Mild illness                            | 15 (33.3%)                           | 9 (39.1%)                | 4 (28.6%)              | 9 (31%)                              | 7 (30.4%)            | 5 (35.7%)            |
| Mild pneumonia                          | 1 (3.3%)                             | 1 (4.3%)                 | 1 (7.1%)               | 0                                    | 0                    | 0                    |
| Severe pneumonia                        | 1 (3.3%)                             | 1 (4.3%)                 | 1 (7.1%)               | 4 (13.8%)                            | 4 (17.4%)            | 4 (28.6%)            |
| <b>Reason for testing</b>               |                                      |                          |                        |                                      |                      |                      |
| Close contact testing                   | 13 (43.3%)                           | 12 (52.2%)               | 8 (57.1%)              | 6 (20.7%)                            | 5 (21.7%)            | 4 (28.6%)            |
| Hospitalization screening               | 5 (16.7%)                            | 4 (17.4%)                | 3 (21.4%)              | 7 (24.1%)                            | 6 (26.1%)            | 5 (35.7%)            |
| Suspected COVID-19                      | 12 (40%)                             | 7 (30.4%)                | 3 (21.4%)              | 6 (20.7%)                            | 5 (21.7%)            | 4 (28.6%)            |
| Travel screening                        | 1 (3.3%)                             | 0                        | 0                      | 10 (34.5%)                           | 7 (30.4%)            | 1 (7.1%)             |
| <b>Symptoms</b>                         |                                      |                          |                        |                                      |                      |                      |
| Abdominal pain                          | 2 (4%)                               | 1 (3.1%)                 | 1 (5%)                 | 0                                    | 0                    | 0                    |
| cough                                   | 4 (8.2%)                             | 4 (12.5%)                | 3 (15%)                | 8 (20.5%)                            | 8 (21.6%)            | 7 (21.9%)            |
| Diarrhea                                | 2 (4%)                               | 2 (6.3%)                 | 2 (10%)                | 0                                    | 0                    | 0                    |
| Fever                                   | 16 (32.6%)                           | 11 (34.4%)               | 6 (30%)                | 12 (30.8%)                           | 10 (27%)             | 8 (25%)              |
| Headache                                | 2 (4%)                               | 2 (6.3%)                 | 1 (5%)                 | 1 (2.6%)                             | 1 (2.7%)             | 1 (3.1%)             |
| Loss of smell                           | 4 (8.2%)                             | 1 (3.1%)                 | 0                      | 1 (2.6%)                             | 1 (2.7%)             | 1 (3.1%)             |
| Loss of taste                           | 4 (8.2%)                             | 1 (3.1%)                 | 0                      | 1 (2.6%)                             | 1 (2.7%)             | 1 (3.1%)             |
| Myalgia                                 | 4 (8.2%)                             | 3 (9.4%)                 | 3 (15%)                | 1 (2.6%)                             | 1 (2.7%)             | 1 (3.1%)             |
| Rhinorrhea                              | 4 (8.2%)                             | 3 (9.4%)                 | 1 (5%)                 | 8 (20.5%)                            | 8 (21.6%)            | 7 (21.9%)            |
| Shortness of breath                     | 3 (6.1%)                             | 2 (6.3%)                 | 2 (10%)                | 3 (7.7%)                             | 3 (8.1%)             | 3 (9.4%)             |
| Sore throat                             | 3 (6.1%)                             | 2 (6.3%)                 | 1 (5%)                 | 3 (7.7%)                             | 3 (8.1%)             | 2 (6.3%)             |
| Vomiting                                | 1 (2%)                               | 0                        | 0                      | 1 (2.6%)                             | 1 (2.7%)             | 1 (3.1%)             |
| <b>Hospitalization</b>                  |                                      |                          |                        |                                      |                      |                      |
| Length of stay in days<br>[median, IQR] | 5 (16.7%)<br>9 [5.75-13]             | 4 (17.4%)<br>9 [7.25-11] | 3 (21.4%)<br>8 [6.5-9] | 6 (20.7%)<br>6 [3-6]                 | 5 (21.7%)<br>6 [3-6] | 5 (35.7%)<br>6 [3-6] |

IQR, interquartile range.

1  
2 \*clinical data for one patient is missing  
3  
4 261  
5  
6 262  
7  
8 263  
9

For peer review only

10  
11  
12  
13  
14  
15  
16  
17  
18  
19  
20  
21  
22  
23  
24  
25  
26  
27  
28  
29  
30  
31  
32  
33  
34  
35  
36  
37  
38  
39  
40  
41  
42  
43  
44  
45  
46  
47  
48  
49  
50  
51  
52  
53  
54  
55  
56  
57  
58  
59  
60

**References:**

1. Samudrala PK, Kumar P, Choudhary K, Thakur N, Wadekar GS, Dayaramani R, et al. Virology, pathogenesis, diagnosis and in-line treatment of COVID-19. *European Journal of Pharmacology*. 2020;883:173375.
2. WHO Coronavirus Disease (COVID-19) Dashboard. World Health Organization. World Health Organization. <https://covid19.who.int/>. Published May 1, 2021. Accessed May 1, 2021.
3. Leidman E, Duca LM, Omura JD, Proia K, Stephens JW, Sauber-Schatz EK. COVID-19 Trends Among Persons Aged 0-24 Years - United States, March 1-December 12, 2020. *MMWR Morbidity and mortality weekly report*. 2021;70(3):88-94.
4. Children and COVID-19: State Data Report. American Academy of Pediatrics and the Children's Hospital Association. <https://services.aap.org/en/pages/2019-novel-coronavirus-covid-19-infections/children-and-covid-19-state-level-data-report/>. Published May 10, 2020. Accessed May 12, 2021.
5. CDC Covid-Response Team. Coronavirus Disease 2019 in Children - United States, February 12-April 2, 2020. *MMWR Morbidity and mortality weekly report*. 2020;69(14):422-426.
6. Lee P-I, Hu Y-L, Chen P-Y, Huang Y-C, Hsueh P-R. Are children less susceptible to COVID-19? *Journal of microbiology, immunology, and infection = Wei mian yu gan ran za zhi*. 2020;53(3):371-372.
7. Alsharrah DY, Al-Haddad F, Aljamaan S, Al-Yaseen M, Al-Mutairi N, Ayed M, et al. 441. Clinical Characteristics of Pediatric SARS-CoV-2 Infection and Coronavirus Disease 2019 (COVID-19) in Kuwait. *Open Forum Infectious Diseases*; 2020: Oxford University Press US. p. S288-S288.
8. Parry J. Covid-19: Hong Kong scientists report first confirmed case of reinfection. *British Medical Journal Publishing Group*; 2020.
9. Abu-Raddad LJ, Chemaitelly H, Coyle P, Malek JA, Ahmed AA, Mohamoud YA, et al. SARS-CoV-2 reinfection in a cohort of 43,000 antibody-positive individuals followed for up to 35 weeks. *medRxiv*. 2021.
10. Lumley SF, O'Donnell D, Stoesser NE, Matthews PC, Howarth A, Hatch SB, et al. Antibody status and incidence of SARS-CoV-2 infection in health care workers. *New England Journal of Medicine*. 2021;384(6):533-540.
11. Hall VJ, Foulkes S, Charlett A, Atti A, Monk EJ, Simmons R, et al. Do antibody positive healthcare workers have lower SARS-CoV-2 infection rates than antibody negative healthcare workers? Large multi-centre prospective cohort study (the SIREN study), England: June to November 2020. *medRxiv*. 2020:2021.2001.2013.21249642.
12. European Centre for Disease Prevention and Control. Reinfection with SARS-CoV: considerations for public health response. <https://www.ecdc.europa.eu/en/publications-data/threat-assessment-brief-reinfection-sars-cov-2#copy-to-clipboard>. Published Sept 21, 2020. Accessed April 15, 2021.
13. Pan American Health Organization/ World Health Organization. Interim guidelines for detecting cases of reinfection by SARS-CoV-2. <https://www.paho.org/en/documents/interim-guidelines-detecting-cases-reinfection-sars-cov-2>. Published Oct 29, 2020. Accessed April 15, 2021.
14. Multisystem inflammatory syndrome in children and adolescents with COVID-19. World Health Organization. <https://www.who.int/publications/i/item/multisystem-inflammatory-syndrome-in-children-and-adolescents-with-covid-19>. Published May 15, 2020. April 10, 2021.
15. WHO. Clinical management of severe acute respiratory infection (SARI) when COVID-19 disease is suspected: interim guidance, 13 March 2020: World Health Organization; 2020.

- 1  
2 314 16. Hansen CH, Michlmayr D, Gubbels SM, Mølbak K, Ethelberg S. Assessment of protection  
3 315 against reinfection with SARS-CoV-2 among 4 million PCR-tested individuals in Denmark  
4 316 in 2020: a population-level observational study. *The Lancet*. 2021.  
5 317 17. Dong Y, Mo X, Hu Y, Qi X, Jiang F, Jiang Z, et al. Epidemiological characteristics of 2143  
6 318 pediatric patients with 2019 coronavirus disease in China. *Pediatrics*. 2020.  
7 319 18. Bajaj V, Gadi N, Spihlman AP, Wu SC, Choi CH, Moulton VR. Aging, Immunity, and  
8 320 COVID-19: How Age Influences the Host Immune Response to Coronavirus Infections?  
9 321 *Front Physiol*. 2020;11:571416.  
10 322 19. Wang X, Guo X, Xin Q, Pan Y, Hu Y, Li J, et al. Neutralizing antibody responses to severe  
11 323 acute respiratory syndrome coronavirus 2 in coronavirus disease 2019 inpatients and  
12 324 convalescent patients. *Clinical Infectious Diseases*. 2020;71(10):2688-2694.  
13 325 20. Chia WN, Zhu F, Ong SWX, Young BE, Fong S-W, Le Bert N, et al. Dynamics of SARS-  
14 326 CoV-2 neutralising antibody responses and duration of immunity: a longitudinal study. *The  
15 327 Lancet Microbe*.  
16 328 21. Lau EHY, Tsang OTY, Hui DSC, Kwan MYW, Chan WH, Chiu SS, et al. Neutralizing  
17 329 antibody titres in SARS-CoV-2 infections. *Nat Commun*. 2021;12(1):63.  
18 330 22. Weisberg SP, Connors TJ, Zhu Y, Baldwin MR, Lin W-H, Wontakal S, et al. Distinct  
19 331 antibody responses to SARS-CoV-2 in children and adults across the COVID-19 clinical  
20 332 spectrum. *Nature immunology*. 2021;22(1):25-31.  
21 333 23. Hodinka RL, Kaiser L, Hodinka RL, Kaiser L. Point-Counterpoint: Is the Era of Viral  
22 334 Culture Over in the Clinical Microbiology Laboratory? *Journal of Clinical Microbiology*.  
23 335 2013;51(1):2-8.  
24 336 24. AlGhounaim M, Xiao Y, Caya C, Papenburg J. Diagnostic yield and clinical impact of  
25 337 routine cell culture for respiratory viruses among children with a negative multiplex RT-  
26 338 PCR result. *J Clin Virol*. 2017;94:107-109.  
27 339  
28 340  
29 341  
30 342  
31 343  
32 344  
33 345  
34 346  
35 347  
36 348  
37 349  
38 350  
39 351  
40 352  
41 353  
42 354  
43 355  
44 356  
45 357  
46 358  
47 359  
48 360  
49  
50  
51  
52  
53  
54  
55  
56  
57  
58  
59  
60

**Table 1.** Demographic characteristics of the study population.

**Table 2.** Clinical characteristics of the study population based on different defined intervals of  
polymerase chain reaction (PCR) repositivity.

**Figure 1:** Flow diagram of the study population

**Figure 2:** Duration between first SARS-CoV-2 infection and subsequent infections. The shaded  
bars represent the duration between positive PCR results.

1  
2  
3 **Figure 1:** Flow diagram of the study population  
4  
5  
6  
7

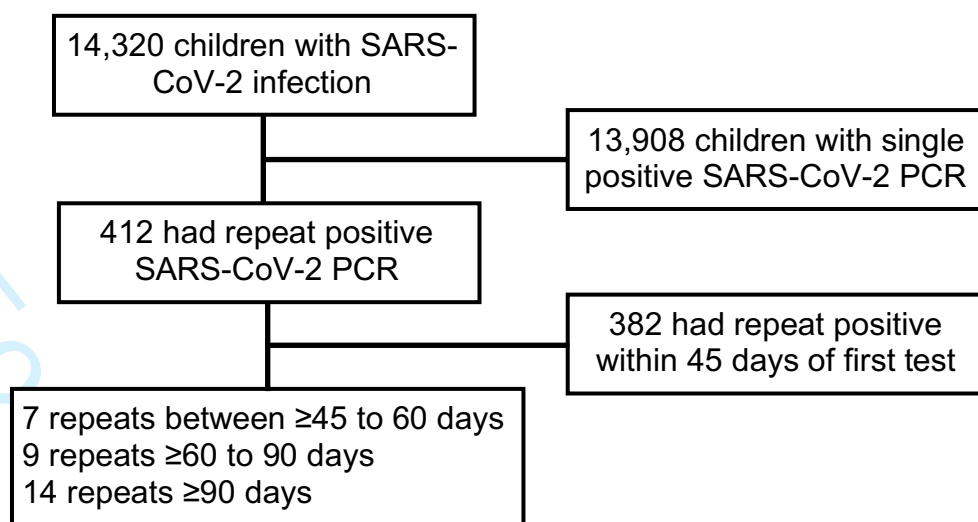

**Figure 2:** Duration between first SARS-CoV-2 infection and subsequent infections. The shaded bars represent the duration between positive PCR results.

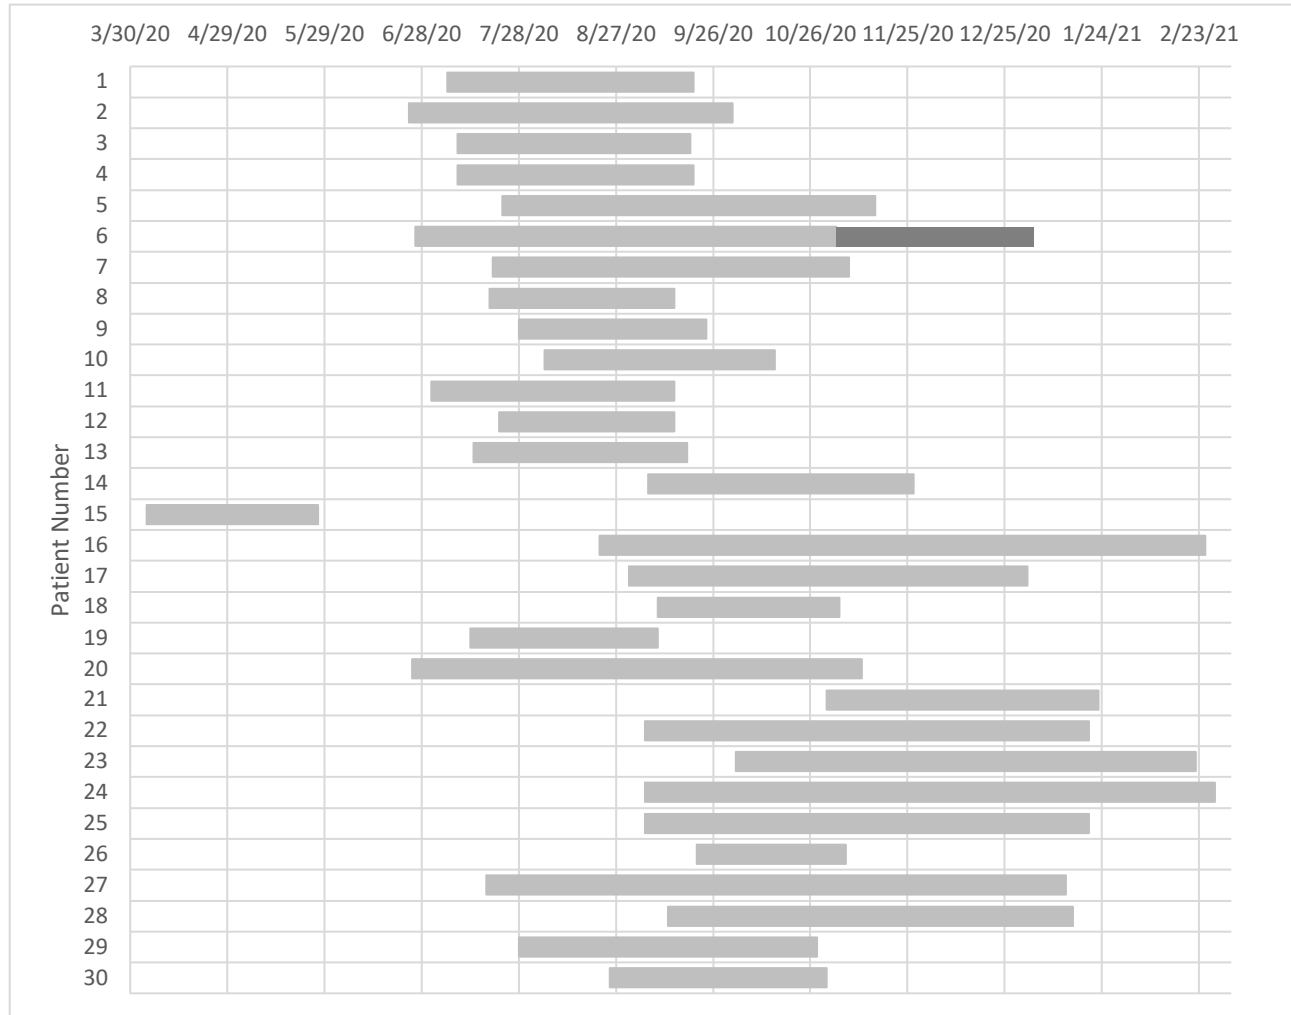

\*Patient 6 had two episodes of reinfection

# BMJ Open

## Incidence of SARS-CoV-2 Reinfection in a Pediatric Cohort in Kuwait

|                                 |                                                                                                                                                                                                                                                                                                                                                                                                                                                                                                                                                                                                                          |
|---------------------------------|--------------------------------------------------------------------------------------------------------------------------------------------------------------------------------------------------------------------------------------------------------------------------------------------------------------------------------------------------------------------------------------------------------------------------------------------------------------------------------------------------------------------------------------------------------------------------------------------------------------------------|
| Journal:                        | <i>BMJ Open</i>                                                                                                                                                                                                                                                                                                                                                                                                                                                                                                                                                                                                          |
| Manuscript ID                   | bmjopen-2021-056371.R1                                                                                                                                                                                                                                                                                                                                                                                                                                                                                                                                                                                                   |
| Article Type:                   | Original research                                                                                                                                                                                                                                                                                                                                                                                                                                                                                                                                                                                                        |
| Date Submitted by the Author:   | 09-Feb-2022                                                                                                                                                                                                                                                                                                                                                                                                                                                                                                                                                                                                              |
| Complete List of Authors:       | Alhaddad, Fatemah; Farwaniya Hospital, Department of Pediatrics<br>Abdulkareem, Ali; Farwaniya Hospital, Department of Pediatrics<br>Alsharrah, Danah; Farwaniya Hospital, Pediatrics<br>Alkandari, Abdullah; Dasman Diabetes Institute,<br>Bin-Hasan, Saadoun ; Farwaniya Hospital, Department of Pediatrics;<br>Dasman Diabetes Institute<br>Al-Ahmad, Mona; Kuwait University Faculty of Medicine, Department of<br>Microbiology<br>Al Hashemi, Hashem ; Farwaniya Hospital, Department of Pediatrics<br>Alghounaim, Mohammed; Amiri Hospital, Pediatric Infectious Diseases<br>Specialist and Medical Microbiologist |
| <b>Primary Subject Heading</b>: | Infectious diseases                                                                                                                                                                                                                                                                                                                                                                                                                                                                                                                                                                                                      |
| Secondary Subject Heading:      | Infectious diseases, Paediatrics, Epidemiology                                                                                                                                                                                                                                                                                                                                                                                                                                                                                                                                                                           |
| Keywords:                       | COVID-19, Epidemiology < INFECTIOUS DISEASES, PAEDIATRICS                                                                                                                                                                                                                                                                                                                                                                                                                                                                                                                                                                |
|                                 |                                                                                                                                                                                                                                                                                                                                                                                                                                                                                                                                                                                                                          |

SCHOLARONE™  
Manuscripts





I, the Submitting Author has the right to grant and does grant on behalf of all authors of the Work (as defined in the below author licence), an exclusive licence and/or a non-exclusive licence for contributions from authors who are: i) UK Crown employees; ii) where BMJ has agreed a CC-BY licence shall apply, and/or iii) in accordance with the terms applicable for US Federal Government officers or employees acting as part of their official duties; on a worldwide, perpetual, irrevocable, royalty-free basis to BMJ Publishing Group Ltd ("BMJ") its licensees and where the relevant Journal is co-owned by BMJ to the co-owners of the Journal, to publish the Work in this journal and any other BMJ products and to exploit all rights, as set out in our [licence](#).

The Submitting Author accepts and understands that any supply made under these terms is made by BMJ to the Submitting Author unless you are acting as an employee on behalf of your employer or a postgraduate student of an affiliated institution which is paying any applicable article publishing charge ("APC") for Open Access articles. Where the Submitting Author wishes to make the Work available on an Open Access basis (and intends to pay the relevant APC), the terms of reuse of such Open Access shall be governed by a Creative Commons licence – details of these licences and which [Creative Commons](#) licence will apply to this Work are set out in our licence referred to above.

Other than as permitted in any relevant BMJ Author's Self Archiving Policies, I confirm this Work has not been accepted for publication elsewhere, is not being considered for publication elsewhere and does not duplicate material already published. I confirm all authors consent to publication of this Work and authorise the granting of this licence.

## Incidence of SARS-CoV-2 Reinfection in a Pediatric Cohort in Kuwait

Fatemah Alhaddad<sup>1</sup>, MD, Ali Abdulkareem<sup>1</sup>, MD, Danah Alsharrah<sup>1</sup>, MD, Abdullah Alkandari<sup>2</sup>, PhD, Saadoun Bin-Hasan<sup>1,2</sup>, MD, Mona Al-Ahmad<sup>3</sup>, MD, Hashem Al Hashemi<sup>1</sup>, MD, Mohammad Alghounaim<sup>4</sup>, MD

<sup>1</sup>Department of Pediatrics, Farwaniyah Hospital, Ministry of Health, Sabah Al-Nasser, Kuwait

<sup>2</sup> Department of Population Health, Dasman Diabetes Institute, Kuwait City, Kuwait

<sup>3</sup> Department of Microbiology, Faculty of Medicine, Kuwait University, Kuwait

<sup>4</sup>Department of Pediatrics, Amiri Hospital, Ministry of Health, Kuwait City, Kuwait

**Keywords:** Children, SARS-CoV-2, COVID-19, reinfection, epidemiology

**Running title:** SARS-CoV-2 Reinfection in Children.

**Conflict of Interest Disclosures:** The authors no conflicts of interest to disclose

**Funding:** None

### Abbreviations:

COVID-19: Coronavirus disease 2019

SARS-CoV-2: Severe acute respiratory syndrome-related coronavirus 2

PCR-Q8: The Pediatric COVID Registry in Kuwait

WHO: World Health Organization.

PCR: polymerase chain reaction

IQR: interquartile range

**Article summary:** National-level study found that pediatric SARS-CoV-2 reinfection is uncommon, and estimated to be 1.02 (95% CI 0.71-1.45) infection per 100,000 person-days

1  
2  
3  
4  
5  
6  
7  
8  
9  
10  
11  
12  
13  
14  
15  
16  
17  
18  
19  
20  
21  
22  
23  
24  
25  
26  
27  
28  
29  
30  
31  
32  
33  
34  
35  
36  
37  
38  
39  
40  
41  
42  
43  
44  
45  
46  
47  
48  
49  
50  
51  
52  
53  
54  
55  
56  
57  
58  
59  
60

26 **Corresponding author:**

27 Dr. Mohammad Alghounaim

28 Department of Pediatrics

29 Amiri Hospital

30 900005 Ibn Misbah St. Sharq block 3

31 Kuwait City, Kuwait

32 Tel: +965-97333099

33 Fax: +965-22436149

34 E-mail: malghounaim@moh.gov.kw

For peer review only

1  
2 38 **Contributors' Statement:**  
3

4 39  
5  
6 40 **Drs Ali Abdulkareem, Danah Alsharrah, and Fatemah Alhaddad** conceptualized and designed  
7  
8  
9 41 the study, curated the data, wrote the original draft of the paper, and revised the manuscript.  
10

11 42 **Dr Abdullah Alkandari** conducted the formal analysis, and critically revised the manuscript  
12

13 43 **Dr Saadoun Bin-Hasan:** conceptualized and designed the study, and critically revised the  
14  
15  
16 44 manuscript.  
17

18 45 **Drs Mona Al-Ahmad and Hashem Al-Hashemi:** conceptualized the study, participated in data  
19  
20 46 curation, and revised the manuscript  
21

22 47 **Dr Mohammed Alghounaim:** conceptualized and designed the study, supervised data collection,  
23  
24  
25 48 conducted initial analysis, and critically revised the manuscript.  
26  
27

28 49 All authors approved the final manuscript as submitted and agree to be accountable for all aspects  
29  
30 50 of the work.  
31  
32  
33

34 51  
35

36 52  
37  
38  
39  
40  
41  
42  
43  
44  
45  
46  
47  
48  
49  
50  
51  
52  
53  
54  
55  
56  
57  
58  
59  
60

1  
2 53 **Abstract**

3  
4 54

5  
6  
7 55 **Objective:** Subsequent protection from severe acute respiratory syndrome-related coronavirus 2  
8  
9 56 (SARS-COV-2) infection in pediatrics is not well reported in the literature. We aimed to describe  
10  
11 57 the clinical characteristics and dynamics of SARS-CoV-2 PCR repositivity in children.

12  
13  
14 58

15  
16 59 **Methods:** This is a population-level retrospective cohort study included children 12 years and  
17  
18 60 younger between February 28, 2020 and March 6, 2021. Patients were identified through multiple  
19  
20 61 national-level electronic coronavirus disease 2019 (COVID-19) databases. SARS-CoV-2  
21  
22 62 reinfection was defined as having two or more positive SARS-CoV-2 PCR done on a respiratory  
23  
24 63 sample, at least 45 days apart. Clinical data was obtained from the Pediatric COVID-19 Registry in  
25  
26 64 Kuwait (PCR-Q8). Descriptive statistics and incidence-sensitivity analyses were performed.

27  
28  
29  
30 65

31  
32 66 **Results:** Thirty pediatric COVID-19 patients had SARS-CoV-2 reinfection at an incidence of 1.02  
33  
34 67 (95% CI 0.71-1.45) infection per 100,000 person-days and a median time to reinfection of 83 days  
35  
36 68 (IQR 62-128.75). The incidence of reinfection decreased to 0.78 (95% CI 0.52-1.17) and 0.47 (95%  
37  
38 69 CI 0.28-0.79) per person-days when the minimum interval between PCR repositivity was increased  
40  
41 70 to 60 and 90 days, respectively. The mean age of reinfected subjects was 8.5 years (IQR 3.7-10.3)  
42  
43 71 and majority (70%) were female. Most children (55.2%) had asymptomatic reinfection. Fever was  
44  
45 72 the most common presentation in symptomatic patients. One immunocompromised experienced two  
46  
47 73 reinfection episodes.

48  
49  
50 74

51  
52  
53 75 **Conclusion:** SARS-CoV-2 reinfection is uncommon in children. Previous confirmed COVID-19 in  
54  
55 76 children seems to induce a protective immunity against future infections.

56  
57  
58 77

59  
60 78

1  
2 79 **Data availability statement:**  
3

4 80 Data are available upon reasonable request  
5  
6  
7 81  
8

9 82 **Strength and limitations of the study**  
10

11 83 - This study used a national-level electronic database that included all SARS-CoV-2 test  
12  
13 84 results that allowed data collection from variable sources and the detection of  
14  
15 85 asymptotically infected children.  
16  
17

18 86 - The result highlights that SARS-CoV-2 reinfection is uncommon in children.  
19

20 87 - The exact risk for SARS-CoV-2 reinfection is difficult to estimate as children are more  
21  
22 88 likely to be asymptomatic, and therefore not all positive cases are detected.  
23  
24

25 89 - Patients' symptoms and severity in this retrospective analysis were dependent on the  
26  
27 90 accuracy of reporting in medical notes and parental recall of symptoms.  
28  
29

30 91 - Due to limited genomic sequencing capacity, proving the direct causality between PCR  
31  
32 92 repositivity and a genetically distinct virus was not possible.  
33  
34

35 93  
36  
37  
38  
39  
40  
41  
42  
43  
44  
45  
46  
47  
48  
49  
50  
51  
52  
53  
54  
55  
56  
57  
58  
59  
60

1  
2 94 **Introduction:**

3  
4 95 Severe acute respiratory syndrome-related coronavirus 2 (SARS-CoV-2) is a  
5  
6 96 novel beta coronavirus that was first described in December 2019 and resulted in a pandemic of  
7  
8  
9 97 respiratory illness, coronavirus disease-2019 (COVID-19) <sup>1</sup>. By early May 2021, the pandemic has  
10  
11 98 resulted in over 150 million cases worldwide and more than three million deaths reported by the  
12  
13 99 World Health Organization (WHO)<sup>2</sup>. Despite the widespread of COVID-19, children compromised  
14  
15  
16 100 less than 15% of all reported cases <sup>3-5</sup>. Limited social interactions, and enhanced infection control  
17  
18 101 measures such as school closure and online teaching, may have contributed to lower proportions of  
19  
20 102 infected children <sup>6</sup>. In addition, children are more likely to have asymptomatic or mild infection  
21  
22  
23 103 compared to adults and, therefore, may not be tested <sup>7</sup>.

24  
25 104  
26  
27 105 Quantifying the duration of natural immunity after the primary SARS-CoV-2 infection has  
28  
29  
30 106 been crucial to address public health measures, to help predict the continuity of the pandemic, and  
31  
32 107 to understand the effect of reinfection on disease severity. The first case of SARS-CoV-2  
33  
34 108 reinfection was reported in August 2020 <sup>8</sup>. Since then, interest in the exact risk and rate of  
35  
36 109 reinfection has been increasing. Several reports estimated that reinfection occurs in less than 1% of  
37  
38  
39 110 previously infected individuals <sup>9-11</sup>. The duration between primary and secondary infection was  
40  
41 111 reported to vary from 48 to 124 days in the first documented cases in literature <sup>12, 13</sup>. However, most  
42  
43 112 of the reinfection studies focused mainly on the adult population. COVID-19 follows different  
44  
45  
46 113 disease dynamics in children, and studies addressing reinfection in this population are lacking.

47  
48 114  
49  
50 115 The first pediatric case of COVID-19 in Kuwait was identified in February 2020 <sup>7</sup>. Since  
51  
52  
53 116 then, schools and daycare centers were closed, and classes were conducted virtually. In addition,  
54  
55 117 commercial centers, gyms, and restaurants were open but with time restrictions and strict protective  
56  
57 118 measures. Early in the pandemic, a national electronic COVID-19 testing database was created and  
58  
59 119 included all SARS-CoV-2 test results of symptomatic individuals, contact tracing, and routine  
60

1  
2 120 travel or hospitalization screening. Also, a national Pediatric COVID-19 Registry (PCR-Q8) was  
3  
4 121 established for children aged 12 years and younger to better understand disease dynamics and  
5  
6 122 update management protocols. This created the unique opportunity to investigate the possibility of  
7  
8  
9 123 reinfection with SARS-CoV-2, with an attempt to establish an average duration between the two  
10  
11 124 positive results, potential factors linked to reinfection, and its clinical severity.  
12

### 13 125 14 15 16 126 17 18 127 **Methods:**

19  
20 128 A population-level retrospective cohort study was conducted in Kuwait between February  
21  
22 129 28<sup>th</sup>, 2020, and March 6<sup>th</sup>, 2021. The national COVID-19 test result database was used to identify  
23  
24  
25 130 children younger than 12 years and had two or more subsequent positive SARS-CoV-2 polymerase  
26  
27 131 chain reaction (PCR) tests done on a respiratory sample, at least 45 days apart. Subjects who had  
28  
29  
30 132 two or more positive SARS-CoV-2 PCR but less than 45 days in-between, and patients who  
31  
32 133 fulfilled the WHO definition of the multisystem inflammatory syndrome in children (MIS-C) were  
33  
34 134 excluded <sup>14</sup>.  
35

36 135  
37  
38  
39 136 To assure the inclusion of all SARS-CoV-2 infected children into this study, the national  
40  
41 137 COVID-19 testing database was used for initial patient identification. This database includes the  
42  
43 138 results for all individuals who had SARS-CoV-2 PCR done on a respiratory specimen nationwide.  
44  
45  
46 139 SARS-CoV-2 PCR is typically done to confirm the diagnosis of symptomatic individuals, detect  
47  
48 140 secondary infections in contact tracing, and identify infected subjects prior to hospitalization or  
49  
50 141 travel. During the study period, the SARS-CoV-2 antigen was not routinely performed on pediatric  
51  
52  
53 142 samples. Also, serum SARS-CoV-2 IgG or IgM tests were not routinely done to confirm current or  
54  
55 143 prior infection. A secondary search query was done on the PCR-Q8 registry, which included patient  
56  
57 144 information from the following sources: hospital records, institutional quarantine centers, patient  
58  
59 145 transport units, as well as all laboratories that provide SARS-CoV-2 PCR.  
60



1  
2 146  
3  
4 147 The PCR-Q8 registry retrospectively collected detailed individual-level demographic,  
5  
6 148 laboratory and clinical characteristics of all children diagnosed with COVID-19 in Kuwait. The  
7  
8  
9 149 database was acquired to obtain demographic and clinical data. COVID-19 severity was categorized  
10  
11 150 based on WHO disease classification<sup>15</sup>. Infected children with mild or asymptomatic COVID-19  
12  
13 151 may not require hospitalization. Therefore, clinical data in the registry may be lacking. For those  
14  
15  
16 152 subjected, parents were contacted to complete missing disease-related data.  
17

18 153  
19  
20 154 Descriptive analysis was performed to compare between primary and secondary infections.  
21  
22  
23 155 To calculate incidence and to account for delayed presentation of reinfection, calculated days at risk  
24  
25 156 included the period from the day of first positive SARS-CoV-2 PCR starting February 28<sup>th</sup>, 2020 to  
26  
27 157 the second positive test or March 6<sup>th</sup>, 2021, whichever is first. However, individuals with the first  
28  
29  
30 158 positive SARS-CoV-2 PCR starting January 1<sup>st</sup>, 2021, were not included in the calculation due to  
31  
32 159 limited time for reinfection to occur. Clopper-Pearson test was used to calculate the 95% CI.  
33  
34 160 Analysis was done using GraphPad Prism (v. 9.0). Due to the variability in established reinfection  
35  
36 161 case definition, sensitivity analysis assessing the clinical presentation and incidence of reinfection  
37  
38  
39 162 considering a minimum interval for PCR repositivity of 60 and 90 days<sup>16</sup>.

40  
41 163  
42  
43 164 **Patient and public involvement statement:**

44  
45 165 Patients were not included in the design, reporting or dissemination plans of our research.  
46  
47  
48 166 However, parents of children with PCR repositivity were contacted to complete missing data. This  
49  
50 167 study was conducted to address epidemiological questions presented by the Pediatric COVID-19  
51  
52  
53 168 Task Force (Ministry of Health, Kuwait). The initial concept and study plan was presented to the  
54  
55 169 committee members, whose suggestions and comments were considered in the final study protocol  
56

57 170  
58  
59 171  
60

1  
2 172 **Ethics:**  
3

4 173 The study was approved by the ethical board of the Ministry of Health, Kuwait (reference no.  
5  
6 174 1607/2020). Verbal consent was obtained from parents who agreed to participate to complete  
7  
8  
9 175 missing clinical data.  
10

11 176  
12  
13  
14  
15  
16  
17  
18  
19  
20  
21  
22  
23  
24  
25  
26  
27  
28  
29  
30  
31  
32  
33  
34  
35  
36  
37  
38  
39  
40  
41  
42  
43  
44  
45  
46  
47  
48  
49  
50  
51  
52  
53  
54  
55  
56  
57  
58  
59  
60

For peer review only

## 1 2 177 **Results**

3  
4 178 During the study period, there were 14,320 documented SARS-CoV-2 infections in children  
5  
6 179 younger than 12 years in Kuwait, accounting for 2,954,372 person-days of follow-up. Among those,  
7  
8  
9 180 421 children with repeat positive SARS-CoV-2 PCR were identified, of which, 30 patients had a  
10  
11 181 repeat positive SARS-CoV-2 45 days or more after the first positive, 391 patients had their repeat  
12  
13 182 test within 45 days and were excluded (figure 1). The incidence of reinfection was 1.02 (95% CI  
14  
15  
16 183 0.71-1.45) infection per 100,000 previously infected person-days. The mean age of the reinfection  
17  
18 184 cohort was 8.5 (IQR 3.7-10.3) years and majority (70%) were females (table 1). More than half  
19  
20 185 (56.6%) of reinfection patients were not known to have any chronic comorbid conditions at the time  
21  
22  
23 186 of the first or second infection.

24  
25 187  
26  
27 188 The median time between the two episodes of infection as evident by the sample collection  
28  
29  
30 189 date was 83 days (IQR 62-128.75 days) (figure 2). Majority of the patients had asymptomatic  
31  
32 190 infection during the first and second episodes, 43.3% and 53.3% respectively (table 2). In  
33  
34 191 symptomatic patients, fever, cough and shortness of breath were the most commonly reported  
35  
36 192 symptoms. One (3.3%) patient had severe pneumonia during the first infection, whereas, four  
37  
38  
39 193 (13.3%) patients had severe pneumonia during second infection. Of those, three patients had mild or  
40  
41 194 asymptomatic initial SARS-CoV-2 infection. One of the four patients was admitted for an acute  
42  
43 195 exacerbation of asthma with three days history of fever. The median length of hospitalization was 9  
44  
45  
46 196 days (IQR 5.75-13 days) and 6 days (IQR 3.75-6.75 days) for the first and second infection,  
47  
48 197 respectively. None of the subjects received care in an intensive care unit.

49  
50 198  
51  
52 199 One female patient previously diagnosed with hypereosinophilic syndrome on low-dose  
53  
54  
55 200 prednisone, had three episodes of SARS-CoV-2 infections. Her first infection was in July 2020  
56  
57 201 where she was admitted for 10 days as a case of severe pneumonia followed by two negative PCR  
58  
59 202 tests done in August. Her second infection was in November 2020 when she was also admitted for

1  
2 203 severe pneumonia with prolonged hospital admission followed by a negative PCR test done in  
3  
4 204 December. Interestingly, during her third infection in January 2021, she was asymptomatic and  
5  
6 205 testing was done for screening before an outpatient appointment.  
7  
8

9 206  
10  
11 207           Around half (46.6%) of reinfections occurred more than 90 days after the initial infection.  
12  
13 208 The incidence of reinfection decreased to 0.78 (95% CI 0.52-1.17) and 0.47 (95% CI 0.28-0.79) per  
14  
15 209 infected person-days when the minimum acceptable duration between PCR repositivity was  
16  
17  
18 210 increased to 60 and 90 days, respectively. Also, there were more symptomatic children (64.3%)  
19  
20 211 during the second infection using the 90-day definition when compared to the 45-day or 60-day  
21  
22 212 minimum interval.  
23  
24  
25 213  
26  
27 214  
28  
29  
30  
31  
32  
33  
34  
35  
36  
37  
38  
39  
40  
41  
42  
43  
44  
45  
46  
47  
48  
49  
50  
51  
52  
53  
54  
55  
56  
57  
58  
59  
60

1  
2 215 **Discussion**

3  
4 216

5  
6 217 The exact risk and factors associated with SARS-CoV-2 reinfection in the pediatric population  
7  
8  
9 218 are still not well understood. We found that a second SARS-CoV-2 infection is uncommon in  
10  
11 219 children with a rate of 1.02 reinfection per 100,000 previously infected person-days and a median  
12  
13 220 time to reinfection of 83 days. The finding of this study is similar to previous reports which showed  
14  
15  
16 221 a reinfection incidence in adults of 0.9-1.3 per 100,000 person-day<sup>9, 11</sup>. Similarly, in a large Danish  
17  
18 222 cohort, prior SARS-CoV-2 provided on average 80.5% protection against repeat infection. The  
19  
20 223 estimated protection differed between different age groups ranging from 47.1% in individuals older  
21  
22 224 than 65 years of age to 82.7% in younger subjects<sup>17</sup>. However, the epidemiology and disease  
23  
24  
25 225 dynamics of SARS-CoV-2 infection are different in children<sup>18</sup>. Therefore, using data generated  
26  
27 226 from adult studies to infer on the pediatric population may not be accurate.

28  
29  
30 227

31  
32 228 Magnitude and persistence of immunological responses conferred by SARS-CoV-2  
33  
34 229 infection can be variable based on age and medical comorbidities<sup>19</sup>. Hence, estimating the duration  
35  
36 230 of protective immunity after acquiring SARS-CoV-2 infection has been the focus of several studies.  
37  
38  
39 231 In an adult study, looking at the neutralizing antibodies, the seropositivity was identified in all  
40  
41 232 participants up to 53 days after infection<sup>20</sup>. However, the level of neutralizing antibodies varies  
42  
43 233 greatly with disease severity and tend to wane over time<sup>21, 22</sup>. Few studies compared humoral  
44  
45  
46 234 responses between adults and children. Weisberg et. al. have shown that children exhibit lower  
47  
48 235 antibody response compared to adults<sup>23</sup>. However, the incidence of reinfections observed in this  
49  
50 236 study was similar to previously reported adult patients.

51  
52  
53 237

54  
55 238 A standard definition of SARS-CoV-2 reinfection is lacking. Traditionally, the detection of  
56  
57 239 viable virus by cell culture has been the standard to ascertain active infection<sup>24</sup>. However, this  
58  
59 240 testing method lacks sensitivity and is time consuming<sup>25</sup>. In addition, due to the need of expertise

1  
2 241 and appropriate laboratory infrastructure, routine population-level testing using cell culture in not  
3  
4 242 possible. For these reasons, the detection of genetically distinct SARS-CoV-2 in different infectious  
5  
6 243 episodes or the use of the cycle threshold (Ct) value as a surrogate for viral load has been suggested  
7  
8  
9 244 <sup>12, 13</sup>. In Kuwait, genomic testing capacity is limited and retrieving patients' samples and laboratory  
10  
11 245 data from several public and private laboratories was logistically challenging. In our study, a 45-day  
12  
13 246 period between two-consecutive positive PCR test was selected based on the expected duration of  
14  
15  
16 247 molecular test positivity on a respiratory sample. Alsharrah et al. reported a median duration of  
17  
18 248 PCR positivity among pediatric COVID-19 patients of 15 days, with maximum duration of 42 days  
19  
20 249 <sup>7</sup>. However, we observed a decline in the rate of repositivity from 1.02 to 0.47 per 100,000  
21  
22  
23 250 previously infected person-days when the definition of PCR-repositivity increased from 45 to 90  
24  
25 251 days. As almost half of cases are asymptomatic, this finding could be due to persistent detection of  
26  
27 252 viral particles by PCR.

28  
29  
30 253  
31  
32 254 Asymptomatic SARS-CoV-2 infection is common in pediatrics. We found that around half  
33  
34 255 of infections (43.3% in initial infection and 55.2% in reinfection) remained asymptomatic on  
35  
36 256 follow-up. This finding is similar to other studies <sup>26</sup>. High proportion of silent infection may pose an  
37  
38  
39 257 important public health concern and limit the effectiveness of transmission mitigation efforts. Also,  
40  
41 258 the possibility of reinfection within a relatively short period of time as observed in this study may  
42  
43 259 be an overlooked source of community transmission. Real-world COVID-19 vaccine effectiveness  
44  
45  
46 260 data showed that reinfection is more common in unvaccinated adults<sup>27</sup>. These findings support the  
47  
48 261 recommendation to offer vaccination to those previously infected.

49  
50 262  
51  
52 263 To our knowledge, this is the first national-level cohort that estimates the risk of pediatric  
53  
54  
55 264 SARS-CoV-2 reinfection. Nevertheless, this study has some limitations. Due to limited genomic  
56  
57 265 sequencing capacity, proving that PCR repositivity was caused by a genetically distinct virus was  
58  
59 266 not possible. However, based on the expected duration of PCR-persistence in children mentioned

1  
2 267 above, one will not expect that PCR done on an upper respiratory specimen to remain positive  
3  
4 268 beyond 45 days. Another limitation was the unavailability of some data recorded in the national  
5  
6 269 pediatric COVID-19 registry. When data was missing, parents were contacted via the telephone,  
7  
8  
9 270 creating a recall bias. In addition, patients with mild upper respiratory tracts symptoms are  
10  
11 271 underreported by parents. Therefore, mild cases are less likely to be tested and can be missed, and  
12  
13 272 underestimate the reinfection rate. However, using the national level electronic record allowed the  
14  
15  
16 273 collection of data from variable sources and the detection of asymptotically infected  
17  
18 274 children. Despite these limitations, this study has shown that reinfection is generally uncommon.  
19  
20 275 Further studies that correlate degree of humoral and cellular immunity, along with wide genomic  
21  
22  
23 276 sequencing surveillance with risk of reinfection are needed to better understand and quantify the  
24  
25 277 risk of repeat SARS-CoV-2 infection.  
26

27 278  
28  
29  
30  
31  
32  
33  
34  
35  
36  
37  
38  
39  
40  
41  
42  
43  
44  
45  
46  
47  
48  
49  
50  
51  
52  
53  
54  
55  
56  
57  
58  
59  
60

1  
2 279 **Acknowledgement:**  
3

4 280 We would like to thank Dr. Hessa Alkandari, chair of the pediatric council in the Ministry of

5  
6 281 Health, Kuwait, for her help in preparing this manuscript. We also thank the research group of the

7  
8  
9 282 Pediatric COVID-19 Registry in Kuwait (PCR-Q8) for their contribution.  
10

11 283  
12  
13  
14  
15  
16  
17  
18  
19  
20  
21  
22  
23  
24  
25  
26  
27  
28  
29  
30  
31  
32  
33  
34  
35  
36  
37  
38  
39  
40  
41  
42  
43  
44  
45  
46  
47  
48  
49  
50  
51  
52  
53  
54  
55  
56  
57  
58  
59  
60

For peer review only



1  
2 284 **Table 1.** Demographic characteristics of the study population

3  
4 285

5

6

7

8

9

10

11

12

13

14

15

16

17

18

19

20

21

22

23

24

25

26

27

28

29

30

31

32

33

34

35

36

37

38

39

40

41

42

43

44

45

46

47

48

49

50

51

52

53

54

55

56

57

58

59

60

| Variable                                                    | Population<br>(n=30) |
|-------------------------------------------------------------|----------------------|
| <b>Age [median, IQR]</b>                                    | 8.6 years [3.7-10.3] |
| <b>Male</b>                                                 | 9 (30%)              |
| <b>Comorbid conditions</b>                                  |                      |
| Asthma                                                      | 2 (6.7%)             |
| Diabetes                                                    | 1 (3.3%)             |
| Healthy                                                     | 17 (56.7%)           |
| Neurological disease                                        | 3 (10%)              |
| Other                                                       | 5 (16.7%)            |
| Preterm                                                     | 1 (3.3%)             |
| <b>Time between 2 episodes</b>                              |                      |
| First positive PCR to reinfection [median, IQR]             | 83 days [62-128.75]  |
| Symptom onset of first episode to reinfection [median, IQR] | 83 days [62.5-130.5] |

286 IQR, interquartile range.

**Table 2.** Clinical characteristics of the study population based on different defined intervals of polymerase chain reaction (PCR) repositivity

| Variable                                | First Infection                      |                          |                        | Second Infection                     |                      |                      |
|-----------------------------------------|--------------------------------------|--------------------------|------------------------|--------------------------------------|----------------------|----------------------|
|                                         | Minimum interval of PCR repositivity |                          |                        | Minimum interval of PCR repositivity |                      |                      |
|                                         | 45 days<br>(n=30)                    | 60 days<br>(n=23)        | 90 days<br>(n=14)      | 45 days<br>(n=29)*                   | 60 days<br>(n=23)    | 90 days<br>(n=14)    |
| <b>Disease severity</b>                 |                                      |                          |                        |                                      |                      |                      |
| Asymptomatic                            | 13 (43.3%)                           | 12 (52.2%)               | 8 (57.1%)              | 16 (55.2%)                           | 12 (52.2%)           | 5 (35.7%)            |
| Mild illness                            | 15 (33.3%)                           | 9 (39.1%)                | 4 (28.6%)              | 9 (31%)                              | 7 (30.4%)            | 5 (35.7%)            |
| Mild pneumonia                          | 1 (3.3%)                             | 1 (4.3%)                 | 1 (7.1%)               | 0                                    | 0                    | 0                    |
| Severe pneumonia                        | 1 (3.3%)                             | 1 (4.3%)                 | 1 (7.1%)               | 4 (13.8%)                            | 4 (17.4%)            | 4 (28.6%)            |
| <b>Reason for testing</b>               |                                      |                          |                        |                                      |                      |                      |
| Close contact testing                   | 13 (43.3%)                           | 12 (52.2%)               | 8 (57.1%)              | 6 (20.7%)                            | 5 (21.7%)            | 4 (28.6%)            |
| Hospitalization screening               | 5 (16.7%)                            | 4 (17.4%)                | 3 (21.4%)              | 7 (24.1%)                            | 6 (26.1%)            | 5 (35.7%)            |
| Suspected COVID-19                      | 12 (40%)                             | 7 (30.4%)                | 3 (21.4%)              | 6 (20.7%)                            | 5 (21.7%)            | 4 (28.6%)            |
| Travel screening                        | 1 (3.3%)                             | 0                        | 0                      | 10 (34.5%)                           | 7 (30.4%)            | 1 (7.1%)             |
| <b>Symptoms</b>                         |                                      |                          |                        |                                      |                      |                      |
| Abdominal pain                          | 2 (4%)                               | 1 (3.1%)                 | 1 (5%)                 | 0                                    | 0                    | 0                    |
| cough                                   | 4 (8.2%)                             | 4 (12.5%)                | 3 (15%)                | 8 (20.5%)                            | 8 (21.6%)            | 7 (21.9%)            |
| Diarrhea                                | 2 (4%)                               | 2 (6.3%)                 | 2 (10%)                | 0                                    | 0                    | 0                    |
| Fever                                   | 16 (32.6%)                           | 11 (34.4%)               | 6 (30%)                | 12 (30.8%)                           | 10 (27%)             | 8 (25%)              |
| Headache                                | 2 (4%)                               | 2 (6.3%)                 | 1 (5%)                 | 1 (2.6%)                             | 1 (2.7%)             | 1 (3.1%)             |
| Loss of smell                           | 4 (8.2%)                             | 1 (3.1%)                 | 0                      | 1 (2.6%)                             | 1 (2.7%)             | 1 (3.1%)             |
| Loss of taste                           | 4 (8.2%)                             | 1 (3.1%)                 | 0                      | 1 (2.6%)                             | 1 (2.7%)             | 1 (3.1%)             |
| Myalgia                                 | 4 (8.2%)                             | 3 (9.4%)                 | 3 (15%)                | 1 (2.6%)                             | 1 (2.7%)             | 1 (3.1%)             |
| Rhinorrhea                              | 4 (8.2%)                             | 3 (9.4%)                 | 1 (5%)                 | 8 (20.5%)                            | 8 (21.6%)            | 7 (21.9%)            |
| Shortness of breath                     | 3 (6.1%)                             | 2 (6.3%)                 | 2 (10%)                | 3 (7.7%)                             | 3 (8.1%)             | 3 (9.4%)             |
| Sore throat                             | 3 (6.1%)                             | 2 (6.3%)                 | 1 (5%)                 | 3 (7.7%)                             | 3 (8.1%)             | 2 (6.3%)             |
| Vomiting                                | 1 (2%)                               | 0                        | 0                      | 1 (2.6%)                             | 1 (2.7%)             | 1 (3.1%)             |
| <b>Hospitalization</b>                  |                                      |                          |                        |                                      |                      |                      |
| Length of stay in days<br>[median, IQR] | 5 (16.7%)<br>9 [5.75-13]             | 4 (17.4%)<br>9 [7.25-11] | 3 (21.4%)<br>8 [6.5-9] | 6 (20.7%)<br>6 [3-6]                 | 5 (21.7%)<br>6 [3-6] | 5 (35.7%)<br>6 [3-6] |

IQR, interquartile range.

1  
2 \*clinical data for one patient is missing  
3  
4 287  
5  
6 288  
7  
8 289  
9

For peer review only

10  
11  
12  
13  
14  
15  
16  
17  
18  
19  
20  
21  
22  
23  
24  
25  
26  
27  
28  
29  
30  
31  
32  
33  
34  
35  
36  
37  
38  
39  
40  
41  
42  
43  
44  
45  
46  
47  
48  
49  
50  
51  
52  
53  
54  
55  
56  
57  
58  
59  
60

1  
2 290 **References:**

- 3 291 1. Samudrala PK, Kumar P, Choudhary K, Thakur N, Wadekar GS, Dayaramani R, et al.  
4 292 Virology, pathogenesis, diagnosis and in-line treatment of COVID-19. *European Journal of*  
5 293 *Pharmacology*. 2020;883:173375.
- 6 294 2. WHO Coronavirus Disease (COVID-19) Dashboard. World Health Organization. World  
7 295 Health Organization. <https://covid19.who.int/>. Published May 1, 2021. Accessed May 1,  
8 296 2021.
- 9 297 3. Leidman E, Duca LM, Omura JD, Proia K, Stephens JW, Sauber-Schatz EK. COVID-19  
10 298 Trends Among Persons Aged 0-24 Years - United States, March 1-December 12, 2020.  
11 299 *MMWR Morbidity and mortality weekly report*. 2021;70(3):88-94.
- 12 300 4. Children and COVID-19: State Data Report. American Academy of Pediatrics and the  
13 301 Children's Hospital Association. [https://services.aap.org/en/pages/2019-novel-coronavirus-](https://services.aap.org/en/pages/2019-novel-coronavirus-covid-19-infections/children-and-covid-19-state-level-data-report/)  
14 302 [covid-19-infections/children-and-covid-19-state-level-data-report/](https://services.aap.org/en/pages/2019-novel-coronavirus-covid-19-infections/children-and-covid-19-state-level-data-report/). Published May 10, 2020.  
15 303 Accessed May 12, 2021.
- 16 304 5. CDC Covid-Response Team. Coronavirus Disease 2019 in Children - United States,  
17 305 February 12-April 2, 2020. *MMWR Morbidity and mortality weekly report*.  
18 306 2020;69(14):422-426.
- 19 307 6. Lee P-I, Hu Y-L, Chen P-Y, Huang Y-C, Hsueh P-R. Are children less susceptible to  
20 308 COVID-19? *Journal of microbiology, immunology, and infection = Wei mian yu gan ran za*  
21 309 *zhi*. 2020;53(3):371-372.
- 22 310 7. Alsharrah DY, Al-Haddad F, Aljamaan S, Al-Yaseen M, Al-Mutairi N, Ayed M, et al. 441.  
23 311 Clinical Characteristics of Pediatric SARS-CoV-2 Infection and Coronavirus Disease 2019  
24 312 (COVID-19) in Kuwait. *Open Forum Infectious Diseases*; 2020: Oxford University Press  
25 313 US. p. S288-S288.
- 26 314 8. Parry J. Covid-19: Hong Kong scientists report first confirmed case of reinfection. British  
27 315 Medical Journal Publishing Group; 2020.
- 28 316 9. Abu-Raddad LJ, Chemaitelly H, Coyle P, Malek JA, Ahmed AA, Mohamoud YA, et al.  
29 317 SARS-CoV-2 reinfection in a cohort of 43,000 antibody-positive individuals followed for  
30 318 up to 35 weeks. *medRxiv*. 2021.
- 31 319 10. Lumley SF, O'Donnell D, Stoesser NE, Matthews PC, Howarth A, Hatch SB, et al.  
32 320 Antibody status and incidence of SARS-CoV-2 infection in health care workers. *New*  
33 321 *England Journal of Medicine*. 2021;384(6):533-540.
- 34 322 11. Hall VJ, Foulkes S, Charlett A, Atti A, Monk EJ, Simmons R, et al. Do antibody positive  
35 323 healthcare workers have lower SARS-CoV-2 infection rates than antibody negative  
36 324 healthcare workers? Large multi-centre prospective cohort study (the SIREN study),  
37 325 England: June to November 2020. *medRxiv*. 2020:2021.2001.2013.21249642.
- 38 326 12. European Centre for Disease Prevention and Control. Reinfection with SARS-CoV:  
39 327 considerations for public health response. [https://www.ecdc.europa.eu/en/publications-](https://www.ecdc.europa.eu/en/publications-data/threat-assessment-brief-reinfection-sars-cov-2#copy-to-clipboard)  
40 328 [data/threat-assessment-brief-reinfection-sars-cov-2#copy-to-clipboard](https://www.ecdc.europa.eu/en/publications-data/threat-assessment-brief-reinfection-sars-cov-2#copy-to-clipboard). Published Sept 21,  
41 329 2020. Accessed April 15, 2021.
- 42 330 13. Pan American Health Organization/ World Health Organization. Interim guidelines for  
43 331 detecting cases of reinfection by SARS-CoV-2.  
44 332 [https://www.paho.org/en/documents/interim-guidelines-detecting-cases-reinfection-sars-](https://www.paho.org/en/documents/interim-guidelines-detecting-cases-reinfection-sars-cov-2)  
45 333 [cov-2](https://www.paho.org/en/documents/interim-guidelines-detecting-cases-reinfection-sars-cov-2). Published Oct 29, 2020. Accessed April 15, 2021.
- 46 334 14. Multisystem inflammatory syndrome in children and adolescents with COVID-19. World  
47 335 Health Organization. [https://www.who.int/publications/i/item/multisystem-inflammatory-](https://www.who.int/publications/i/item/multisystem-inflammatory-syndrome-in-children-and-adolescents-with-covid-19)  
48 336 [syndrome-in-children-and-adolescents-with-covid-19](https://www.who.int/publications/i/item/multisystem-inflammatory-syndrome-in-children-and-adolescents-with-covid-19). Published May 15, 2020. April 10,  
49 337 2021.
- 50 338 15. WHO. Clinical management of severe acute respiratory infection (SARI) when COVID-19  
51 339 disease is suspected: interim guidance, 13 March 2020: World Health Organization; 2020.
- 52 340 16. European Centre for Disease Prevention and Control. Reinfection with SARS-CoV-2:  
53 341 implementation of a surveillance case definition within the EU/EEA.

- 1  
2 342 [https://www.ecdc.europa.eu/en/publications-data/reinfection-sars-cov-2-implementation-](https://www.ecdc.europa.eu/en/publications-data/reinfection-sars-cov-2-implementation-surveillance-case-definition-within-eueea)  
3 343 [surveillance-case-definition-within-eueea](https://www.ecdc.europa.eu/en/publications-data/reinfection-sars-cov-2-implementation-surveillance-case-definition-within-eueea). Published 8 April 2021.
- 4 344 17. Hansen CH, Michlmayr D, Gubbels SM, Mølbak K, Ethelberg S. Assessment of protection  
5 345 against reinfection with SARS-CoV-2 among 4 million PCR-tested individuals in Denmark  
6 346 in 2020: a population-level observational study. *The Lancet*. 2021.
- 8 347 18. Dong Y, Mo X, Hu Y, Qi X, Jiang F, Jiang Z, et al. Epidemiological characteristics of 2143  
9 348 pediatric patients with 2019 coronavirus disease in China. *Pediatrics*. 2020.
- 10 349 19. Bajaj V, Gadi N, Spihlman AP, Wu SC, Choi CH, Moulton VR. Aging, Immunity, and  
11 350 COVID-19: How Age Influences the Host Immune Response to Coronavirus Infections?  
12 351 *Front Physiol*. 2020;11:571416.
- 13 352 20. Wang X, Guo X, Xin Q, Pan Y, Hu Y, Li J, et al. Neutralizing antibody responses to severe  
14 353 acute respiratory syndrome coronavirus 2 in coronavirus disease 2019 inpatients and  
15 354 convalescent patients. *Clinical Infectious Diseases*. 2020;71(10):2688-2694.
- 17 355 21. Chia WN, Zhu F, Ong SWX, Young BE, Fong S-W, Le Bert N, et al. Dynamics of SARS-  
18 356 CoV-2 neutralising antibody responses and duration of immunity: a longitudinal study. *The*  
19 357 *Lancet Microbe*.
- 20 358 22. Lau EHY, Tsang OTY, Hui DSC, Kwan MYW, Chan WH, Chiu SS, et al. Neutralizing  
21 359 antibody titres in SARS-CoV-2 infections. *Nat Commun*. 2021;12(1):63.
- 23 360 23. Weisberg SP, Connors TJ, Zhu Y, Baldwin MR, Lin W-H, Wontakal S, et al. Distinct  
24 361 antibody responses to SARS-CoV-2 in children and adults across the COVID-19 clinical  
25 362 spectrum. *Nature immunology*. 2021;22(1):25-31.
- 26 363 24. Hodinka RL, Kaiser L, Hodinka RL, Kaiser L. Point-Counterpoint: Is the Era of Viral  
27 364 Culture Over in the Clinical Microbiology Laboratory? *Journal of Clinical Microbiology*.  
28 365 2013;51(1):2-8.
- 30 366 25. AlGhounaim M, Xiao Y, Caya C, Papenburg J. Diagnostic yield and clinical impact of  
31 367 routine cell culture for respiratory viruses among children with a negative multiplex RT-  
32 368 PCR result. *J Clin Virol*. 2017;94:107-109.
- 33 369 26. He J, Guo Y, Mao R, Zhang J. Proportion of asymptomatic coronavirus disease 2019: A  
34 370 systematic review and meta-analysis. *J Med Virol*. 2021;93(2):820-830.
- 35 371 27. Pouwels KB, Pritchard E, Matthews PC, Stoesser N, Eyre DW, Vihta KD, et al. Effect of  
36 372 Delta variant on viral burden and vaccine effectiveness against new SARS-CoV-2 infections  
37 373 in the UK. *Nat Med*. 2021;27(12):2127-2135.

43 378 **Table 1.** Demographic characteristics of the study population.

45 379 **Table 2.** Clinical characteristics of the study population based on different defined intervals of  
46  
47  
48 380 polymerase chain reaction (PCR) repositivity.

50 381 **Figure 1:** Flow diagram of the study population

52 382 **Figure 2:** Duration between first SARS-CoV-2 infection and subsequent infections. The shaded  
53  
54 383 bars represent the duration between positive PCR results.

1  
2 387  
3  
4 388  
5  
6  
7  
8  
9  
10  
11  
12  
13  
14  
15  
16  
17  
18  
19  
20  
21  
22  
23  
24  
25  
26  
27  
28  
29  
30  
31  
32  
33  
34  
35  
36  
37  
38  
39  
40  
41  
42  
43  
44  
45  
46  
47  
48  
49  
50  
51  
52  
53  
54  
55  
56  
57  
58  
59  
60

For peer review only

**Figure 1:** Flow diagram of the study population

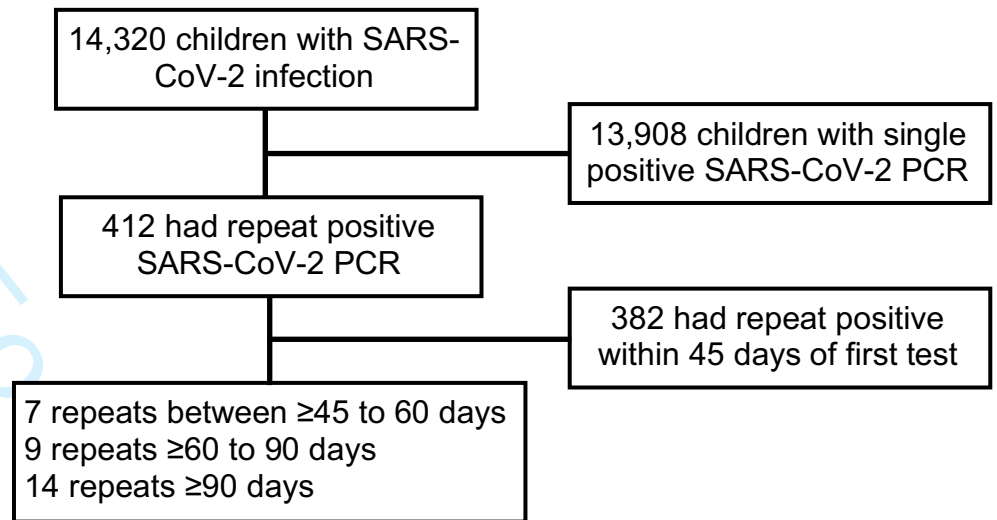

**Figure 2:** Duration between first SARS-CoV-2 infection and subsequent infections. The shaded bars represent the duration between positive PCR results.

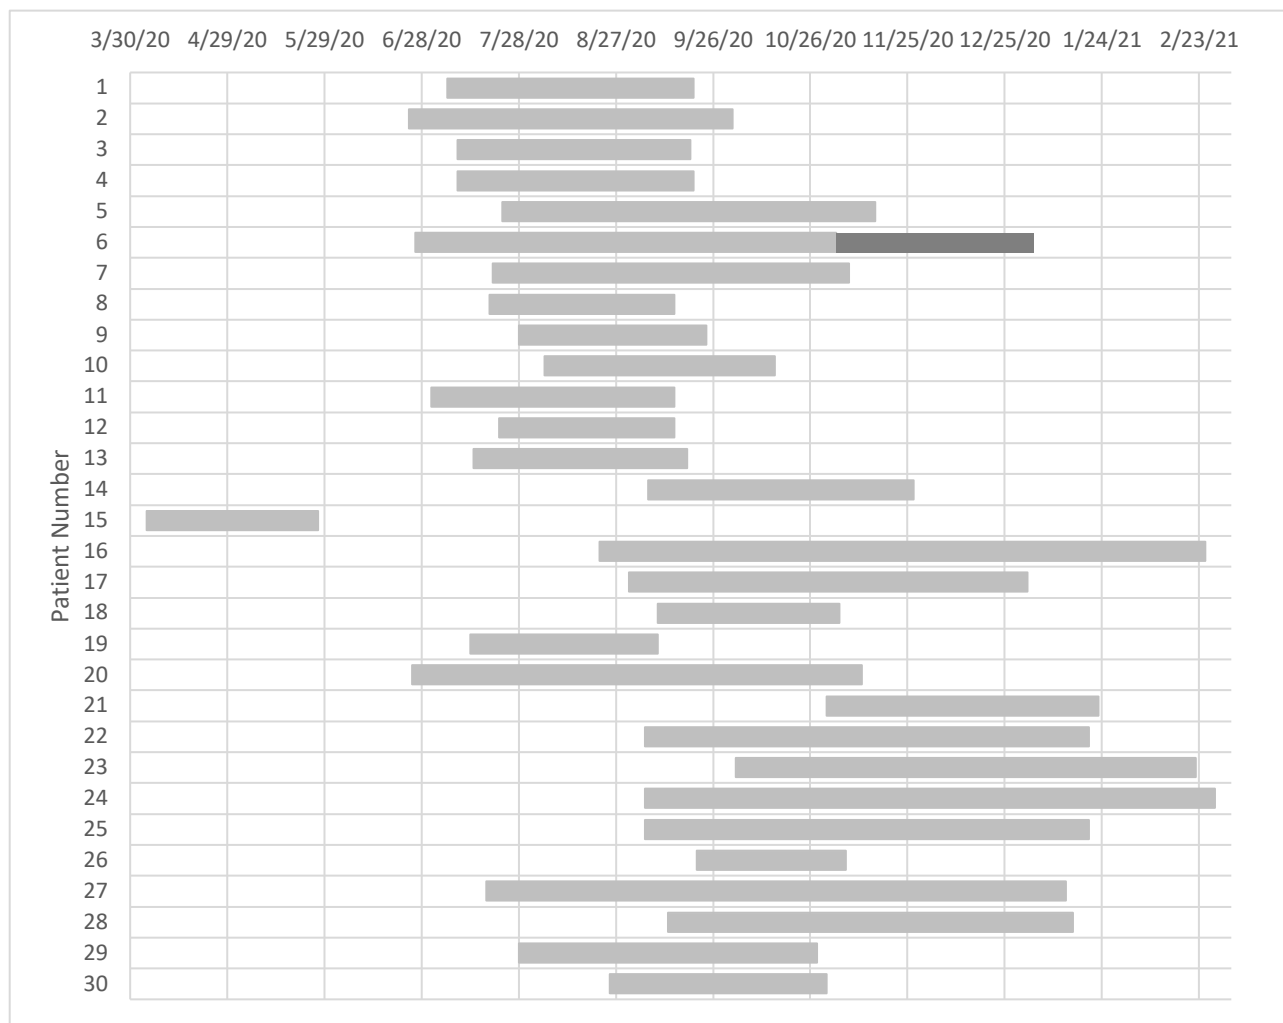

\*Patient 6 had two episodes of reinfection



1  
2  
3  
4  
5  
6  
7  
8  
9  
10  
11  
12  
13  
14  
15  
16  
17  
18  
19  
20  
21  
22  
23  
24  
25  
26  
27  
28  
29  
30  
31  
32  
33  
34  
35  
36  
37  
38  
39  
40  
41  
42  
43  
44  
45  
46  
47  
48  
49  
50  
51  
52  
53  
54  
55  
56  
57  
58  
59  
60

## ICMJE DISCLOSURE FORM

**Date: 11/8/2021**

**Your Name: Danah Alsharrah**

**Manuscript Title: Incidence of SARS-CoV-2 Reinfection in a Pediatric Cohort in Kuwait**

**Manuscript number (if known): Not known**

In the interest of transparency, we ask you to disclose all relationships/activities/interests listed below that are related to the content of your manuscript. "Related" means any relation with for-profit or not-for-profit third parties whose interests may be affected by the content of the manuscript. Disclosure represents a commitment to transparency and does not necessarily indicate a bias. If you are in doubt about whether to list a relationship/activity/interest, it is preferable that you do so.

The following questions apply to the author's relationships/activities/interests as they relate to the current manuscript only.

The author's relationships/activities/interests should be defined broadly. For example, if your manuscript pertains to the epidemiology of hypertension, you should declare all relationships with manufacturers of antihypertensive medication, even if that medication is not mentioned in the manuscript.

In item #1 below, report all support for the work reported in this manuscript without time limit. For all other items, the time frame for disclosure is the past 36 months.

|                                                           |                                                                                                                                                                                | Name all entities with whom you have this relationship or indicate none (add rows as needed) | Specifications/Comments (e.g., if payments were made to you or to your institution) |
|-----------------------------------------------------------|--------------------------------------------------------------------------------------------------------------------------------------------------------------------------------|----------------------------------------------------------------------------------------------|-------------------------------------------------------------------------------------|
| <b>Time frame: Since the initial planning of the work</b> |                                                                                                                                                                                |                                                                                              |                                                                                     |
| 1                                                         | All support for the present manuscript (e.g., funding, provision of study materials, medical writing, article processing charges, etc.)<br><b>No time limit for this item.</b> | None                                                                                         | None                                                                                |
| <b>Time frame: past 36 months</b>                         |                                                                                                                                                                                |                                                                                              |                                                                                     |
| 2                                                         | Grants or contracts from any entity (if not indicated in item #1 above).                                                                                                       | ___ None                                                                                     | None                                                                                |
| 3                                                         | Royalties or licenses                                                                                                                                                          | ___ None                                                                                     | None                                                                                |

|    |                                                                                                              |          |      |
|----|--------------------------------------------------------------------------------------------------------------|----------|------|
| 4  | Consulting fees                                                                                              | ___ None | None |
|    |                                                                                                              |          |      |
|    |                                                                                                              |          |      |
| 5  | Payment or honoraria for lectures, presentations, speakers bureaus, manuscript writing or educational events | ___ None | None |
|    |                                                                                                              |          |      |
|    |                                                                                                              |          |      |
| 6  | Payment for expert testimony                                                                                 | ___ None | None |
|    |                                                                                                              |          |      |
|    |                                                                                                              |          |      |
| 7  | Support for attending meetings and/or travel                                                                 | ___ None | None |
|    |                                                                                                              |          |      |
|    |                                                                                                              |          |      |
| 8  | Patents planned, issued or pending                                                                           | ___ None | None |
|    |                                                                                                              |          |      |
|    |                                                                                                              |          |      |
| 9  | Participation on a Data Safety Monitoring Board or Advisory Board                                            | ___ None | None |
|    |                                                                                                              |          |      |
|    |                                                                                                              |          |      |
| 10 | Leadership or fiduciary role in other board, society, committee or advocacy group, paid or unpaid            | ___ None | None |
|    |                                                                                                              |          |      |
|    |                                                                                                              |          |      |
| 11 | Stock or stock options                                                                                       | ___ None | None |
|    |                                                                                                              |          |      |
|    |                                                                                                              |          |      |
| 12 | Receipt of equipment, materials, drugs, medical writing, gifts or other services                             | ___ None | None |
|    |                                                                                                              |          |      |
|    |                                                                                                              |          |      |
| 13 | Other financial or non-financial interests                                                                   | ___ None | None |
|    |                                                                                                              |          |      |
|    |                                                                                                              |          |      |

Please place an "X" next to the following statement to indicate your agreement:

**X I certify that I have answered every question and have not altered the wording of any of the questions on this form.**

1  
2  
3  
4  
5  
6  
7  
8  
9  
10  
11  
12  
13  
14  
15  
16  
17  
18  
19  
20  
21  
22  
23  
24  
25  
26  
27  
28  
29  
30  
31  
32  
33  
34  
35  
36  
37  
38  
39  
40  
41  
42  
43  
44  
45  
46  
47  
48  
49  
50  
51  
52  
53  
54  
55  
56  
57  
58  
59  
60

**Dr. Danah Alsharrah**  
Department of Pediatrics,  
Farwaniyah Hospital,  
Ministry of Health, Sabah Al-Nasser, Kuwait

For peer review only

## Incidence of Potential SARS-CoV-2 Reinfection in a Pediatric Cohort in Kuwait

STROBE Statement—checklist of items that should be included in reports of observational studies

|                           | Item No | Recommendation                                                                                                                                                                             | Page and line number                               |
|---------------------------|---------|--------------------------------------------------------------------------------------------------------------------------------------------------------------------------------------------|----------------------------------------------------|
| <b>Title and abstract</b> | 1       | (a) Indicate the study's design with a commonly used term in the title or the abstract                                                                                                     | P 1, L 1                                           |
|                           |         | (b) Provide in the abstract an informative and balanced summary of what was done and what was found                                                                                        | P 4                                                |
| <b>Introduction</b>       |         |                                                                                                                                                                                            |                                                    |
| Background/rationale      | 2       | Explain the scientific background and rationale for the investigation being reported                                                                                                       | P 6, L 105-123                                     |
| Objectives                | 3       | State specific objectives, including any prespecified hypotheses                                                                                                                           | P 7, L 132-134                                     |
| <b>Methods</b>            |         |                                                                                                                                                                                            |                                                    |
| Study design              | 4       | Present key elements of study design early in the paper                                                                                                                                    | P 7, L 138                                         |
| Setting                   | 5       | Describe the setting, locations, and relevant dates, including periods of recruitment, exposure, follow-up, and data collection                                                            | Dates: P7, L139<br>Exp: P7, L 146<br>Data: P8, 157 |
| Participants              | 6       | (a) <i>Cohort study</i> —Give the eligibility criteria, and the sources and methods of selection of participants. Describe methods of follow-up                                            | P 7, L138 and P8, L 157                            |
|                           |         | <i>Case-control study</i> —Give the eligibility criteria, and the sources and methods of case ascertainment and control selection. Give the rationale for the choice of cases and controls | Exclusion: P 7, L142                               |
|                           |         | <i>Cross-sectional study</i> —Give the eligibility criteria, and the sources and methods of selection of participants                                                                      |                                                    |
|                           |         | (b) <i>Cohort study</i> —For matched studies, give matching criteria and number of exposed and unexposed                                                                                   | NA                                                 |
|                           |         | <i>Case-control study</i> —For matched studies, give matching criteria and the number of controls per case                                                                                 |                                                    |
| Variables                 | 7       | Clearly define all outcomes, exposures, predictors, potential confounders, and effect modifiers. Give diagnostic criteria, if applicable                                                   | P 7, L 146<br>Outcome: P7, L140                    |
| Data sources/measurement  | 8*      | For each variable of interest, give sources of data and details of methods of assessment (measurement). Describe comparability of assessment methods if there is more than one group       | P8, L157                                           |
| Bias                      | 9       | Describe any efforts to address potential sources of bias                                                                                                                                  | Potential recall bias is mentioned in limitation   |
| Study size                | 10      | Explain how the study size was arrived at                                                                                                                                                  | NA                                                 |
| Quantitative variables    | 11      | Explain how quantitative variables were handled in the analyses. If applicable, describe which groupings were chosen and why                                                               | P 8, L165                                          |
| Statistical methods       | 12      | (a) Describe all statistical methods, including those used to control for confounding                                                                                                      | NA                                                 |
|                           |         | (b) Describe any methods used to examine subgroups and interactions                                                                                                                        | P8, L 170                                          |
|                           |         | (c) Explain how missing data were addressed                                                                                                                                                | NA                                                 |
|                           |         | (d) <i>Cohort study</i> —If applicable, explain how loss to follow-up was addressed                                                                                                        | NA                                                 |
|                           |         | <i>Case-control study</i> —If applicable, explain how matching of cases and controls was addressed                                                                                         |                                                    |
|                           |         | <i>Cross-sectional study</i> —If applicable, describe analytical methods taking account of sampling strategy                                                                               |                                                    |
|                           |         | (e) Describe any sensitivity analyses                                                                                                                                                      | P8, L 170                                          |

1  
2  
3  
4  
5  
6  
7  
8  
9  
10  
11  
12  
13  
14  
15  
16  
17  
18  
19  
20  
21  
22  
23  
24  
25  
26  
27  
28  
29  
30  
31  
32  
33  
34  
35  
36  
37  
38  
39  
40  
41  
42  
43  
44  
45  
46  
47  
48  
49  
50  
51  
52  
53  
54  
55  
56  
57  
58  
59  
60

| <b>Results</b>           |     |                                                                                                                                                                                                              | <b>Page and line number</b>                                   |
|--------------------------|-----|--------------------------------------------------------------------------------------------------------------------------------------------------------------------------------------------------------------|---------------------------------------------------------------|
| Participants             | 13* | (a) Report numbers of individuals at each stage of study—eg numbers potentially eligible, examined for eligibility, confirmed eligible, included in the study, completing follow-up, and analysed            | P 9, L 183                                                    |
|                          |     | (b) Give reasons for non-participation at each stage                                                                                                                                                         | P 9, L187                                                     |
|                          |     | (c) Consider use of a flow diagram                                                                                                                                                                           | Figure 1                                                      |
| Descriptive data         | 14* | (a) Give characteristics of study participants (eg demographic, clinical, social) and information on exposures and potential confounders                                                                     | P 9, L 193                                                    |
|                          |     | (b) Indicate number of participants with missing data for each variable of interest                                                                                                                          | Table 1-<br>no missing data<br>Table 2 –<br>indicated<br>by * |
|                          |     | (c) <i>Cohort study</i> —Summarise follow-up time (eg, average and total amount)                                                                                                                             | P9, L 184                                                     |
| Outcome data             | 15* | <i>Cohort study</i> —Report numbers of outcome events or summary measures over time                                                                                                                          | P9, L183-<br>190                                              |
|                          |     | <i>Case-control study</i> —Report numbers in each exposure category, or summary measures of exposure                                                                                                         |                                                               |
|                          |     | <i>Cross-sectional study</i> —Report numbers of outcome events or summary measures                                                                                                                           |                                                               |
| Main results             | 16  | (a) Give unadjusted estimates and, if applicable, confounder-adjusted estimates and their precision (eg, 95% confidence interval). Make clear which confounders were adjusted for and why they were included | P9, L187                                                      |
|                          |     | (b) Report category boundaries when continuous variables were categorized                                                                                                                                    | done                                                          |
|                          |     | (c) If relevant, consider translating estimates of relative risk into absolute risk for a meaningful time period                                                                                             | NA                                                            |
| Other analyses           | 17  | Report other analyses done—eg analyses of subgroups and interactions, and sensitivity analyses                                                                                                               | P 10, L213                                                    |
| <b>Discussion</b>        |     |                                                                                                                                                                                                              |                                                               |
| Key results              | 18  | Summarise key results with reference to study objectives                                                                                                                                                     | P11, L 223                                                    |
| Limitations              | 19  | Discuss limitations of the study, taking into account sources of potential bias or imprecision. Discuss both direction and magnitude of any potential bias                                                   | P12, L272                                                     |
| Interpretation           | 20  | Give a cautious overall interpretation of results considering objectives, limitations, multiplicity of analyses, results from similar studies, and other relevant evidence                                   | P11, 234-<br>P12 L269                                         |
| Generalisability         | 21  | Discuss the generalisability (external validity) of the study results                                                                                                                                        | P12, L 280                                                    |
| <b>Other information</b> |     |                                                                                                                                                                                                              |                                                               |
| Funding                  | 22  | Give the source of funding and the role of the funders for the present study and, if applicable, for the original study on which the present article is based                                                | P1, L15                                                       |

\*Give information separately for cases and controls in case-control studies and, if applicable, for exposed and unexposed groups in cohort and cross-sectional studies.

**Note:** An Explanation and Elaboration article discusses each checklist item and gives methodological background and published examples of transparent reporting. The STROBE checklist is best used in conjunction with this article (freely

1  
2 available on the Web sites of PLoS Medicine at <http://www.plosmedicine.org/>, Annals of Internal Medicine at  
3 <http://www.annals.org/>, and Epidemiology at <http://www.epidem.com/>). Information on the STROBE Initiative is  
4 available at [www.strobe-statement.org](http://www.strobe-statement.org).  
5  
6  
7  
8  
9  
10  
11  
12  
13  
14  
15  
16  
17  
18  
19  
20  
21  
22  
23  
24  
25  
26  
27  
28  
29  
30  
31  
32  
33  
34  
35  
36  
37  
38  
39  
40  
41  
42  
43  
44  
45  
46  
47  
48  
49  
50  
51  
52  
53  
54  
55  
56  
57  
58  
59  
60

For peer review only

# BMJ Open

## Incidence of SARS-CoV-2 Reinfection in a Pediatric Cohort in Kuwait

|                                 |                                                                                                                                                                                                                                                                                                                                                                                                                                                                                                                                                                                                                          |
|---------------------------------|--------------------------------------------------------------------------------------------------------------------------------------------------------------------------------------------------------------------------------------------------------------------------------------------------------------------------------------------------------------------------------------------------------------------------------------------------------------------------------------------------------------------------------------------------------------------------------------------------------------------------|
| Journal:                        | <i>BMJ Open</i>                                                                                                                                                                                                                                                                                                                                                                                                                                                                                                                                                                                                          |
| Manuscript ID                   | bmjopen-2021-056371.R2                                                                                                                                                                                                                                                                                                                                                                                                                                                                                                                                                                                                   |
| Article Type:                   | Original research                                                                                                                                                                                                                                                                                                                                                                                                                                                                                                                                                                                                        |
| Date Submitted by the Author:   | 29-Mar-2022                                                                                                                                                                                                                                                                                                                                                                                                                                                                                                                                                                                                              |
| Complete List of Authors:       | Alhaddad, Fatemah; Farwaniya Hospital, Department of Pediatrics<br>Abdulkareem, Ali; Farwaniya Hospital, Department of Pediatrics<br>Alsharrah, Danah; Farwaniya Hospital, Pediatrics<br>Alkandari, Abdullah; Dasman Diabetes Institute,<br>Bin-Hasan, Saadoun ; Farwaniya Hospital, Department of Pediatrics;<br>Dasman Diabetes Institute<br>Al-Ahmad, Mona; Kuwait University Faculty of Medicine, Department of<br>Microbiology<br>Al Hashemi, Hashem ; Farwaniya Hospital, Department of Pediatrics<br>Alghounaim, Mohammed; Amiri Hospital, Pediatric Infectious Diseases<br>Specialist and Medical Microbiologist |
| <b>Primary Subject Heading</b>: | Infectious diseases                                                                                                                                                                                                                                                                                                                                                                                                                                                                                                                                                                                                      |
| Secondary Subject Heading:      | Infectious diseases, Paediatrics, Epidemiology                                                                                                                                                                                                                                                                                                                                                                                                                                                                                                                                                                           |
| Keywords:                       | COVID-19, Epidemiology < INFECTIOUS DISEASES, PAEDIATRICS                                                                                                                                                                                                                                                                                                                                                                                                                                                                                                                                                                |
|                                 |                                                                                                                                                                                                                                                                                                                                                                                                                                                                                                                                                                                                                          |

SCHOLARONE™  
Manuscripts



I, the Submitting Author has the right to grant and does grant on behalf of all authors of the Work (as defined in the below author licence), an exclusive licence and/or a non-exclusive licence for contributions from authors who are: i) UK Crown employees; ii) where BMJ has agreed a CC-BY licence shall apply, and/or iii) in accordance with the terms applicable for US Federal Government officers or employees acting as part of their official duties; on a worldwide, perpetual, irrevocable, royalty-free basis to BMJ Publishing Group Ltd ("BMJ") its licensees and where the relevant Journal is co-owned by BMJ to the co-owners of the Journal, to publish the Work in this journal and any other BMJ products and to exploit all rights, as set out in our [licence](#).

The Submitting Author accepts and understands that any supply made under these terms is made by BMJ to the Submitting Author unless you are acting as an employee on behalf of your employer or a postgraduate student of an affiliated institution which is paying any applicable article publishing charge ("APC") for Open Access articles. Where the Submitting Author wishes to make the Work available on an Open Access basis (and intends to pay the relevant APC), the terms of reuse of such Open Access shall be governed by a Creative Commons licence – details of these licences and which [Creative Commons](#) licence will apply to this Work are set out in our licence referred to above.

Other than as permitted in any relevant BMJ Author's Self Archiving Policies, I confirm this Work has not been accepted for publication elsewhere, is not being considered for publication elsewhere and does not duplicate material already published. I confirm all authors consent to publication of this Work and authorise the granting of this licence.



## Incidence of SARS-CoV-2 Reinfection in a Pediatric Cohort in Kuwait

Fatemah Alhaddad<sup>1</sup>, MD, Ali Abdulkareem<sup>1</sup>, MD, Danah Alsharrah<sup>1</sup>, MD, Abdullah Alkandari<sup>2</sup>, PhD, Saadoun Bin-Hasan<sup>1,2</sup>, MD, Mona Al-Ahmad<sup>3</sup>, MD, Hashem Al Hashemi<sup>1</sup>, MD, Mohammad Alghounaim<sup>4</sup>, MD

<sup>1</sup>Department of Pediatrics, Farwaniyah Hospital, Ministry of Health, Sabah Al-Nasser, Kuwait

<sup>2</sup> Department of Population Health, Dasman Diabetes Institute, Kuwait City, Kuwait

<sup>3</sup> Department of Microbiology, Faculty of Medicine, Kuwait University, Kuwait

<sup>4</sup>Department of Pediatrics, Amiri Hospital, Ministry of Health, Kuwait City, Kuwait

**Keywords:** Children, SARS-CoV-2, COVID-19, reinfection, epidemiology

**Running title:** SARS-CoV-2 Reinfection in Children.

**Conflict of Interest Disclosures:** The authors no conflicts of interest to disclose

**Funding:** None

### Abbreviations:

COVID-19: Coronavirus disease 2019

SARS-CoV-2: Severe acute respiratory syndrome-related coronavirus 2

PCR-Q8: The Pediatric COVID Registry in Kuwait

WHO: World Health Organization.

PCR: polymerase chain reaction

IQR: interquartile range

**Article summary:** National-level study found that pediatric SARS-CoV-2 reinfection is uncommon, and estimated to be 1.02 (95% CI 0.71-1.45) infection per 100,000 person-days

1  
2  
3  
4  
5  
6  
7  
8  
9  
10  
11  
12  
13  
14  
15  
16  
17  
18  
19  
20  
21  
22  
23  
24  
25  
26  
27  
28  
29  
30  
31  
32  
33  
34  
35  
36  
37  
38  
39  
40  
41  
42  
43  
44  
45  
46  
47  
48  
49  
50  
51  
52  
53  
54  
55  
56  
57  
58  
59  
60

26 **Corresponding author:**

27 Dr. Mohammad Alghounaim

28 Department of Pediatrics

29 Amiri Hospital

30 900005 Ibn Misbah St. Sharq block 3

31 Kuwait City, Kuwait

32 Tel: +965-97333099

33 Fax: +965-22436149

34 E-mail: malghounaim@moh.gov.kw

For peer review only

1  
2 38 **Contributors' Statement:**  
3

4 39  
5

6 40 **Drs Ali Abdulkareem, Danah Alsharrah, and Fatemah Alhaddad** conceptualized and designed  
7  
8  
9 41 the study, curated the data, wrote the original draft of the paper, and revised the manuscript.  
10

11 42 **Dr Abdullah Alkandari** conducted the formal analysis, and critically revised the manuscript  
12

13 43 **Dr Saadoun Bin-Hasan:** conceptualized and designed the study, and critically revised the  
14  
15  
16 44 manuscript.  
17

18 45 **Drs Mona Al-Ahmad and Hashem Al-Hashemi:** conceptualized the study, participated in data  
19  
20 46 curation, and revised the manuscript  
21

22 47 **Dr Mohammed Alghounaim:** conceptualized and designed the study, supervised data collection,  
23  
24  
25 48 conducted initial analysis, and critically revised the manuscript.  
26  
27

28 49 All authors approved the final manuscript as submitted and agree to be accountable for all aspects  
29  
30 50 of the work.  
31  
32  
33

34 51  
35

36 52  
37  
38  
39  
40  
41  
42  
43  
44  
45  
46  
47  
48  
49  
50  
51  
52  
53  
54  
55  
56  
57  
58  
59  
60

1  
2 53 **Abstract**

3  
4 54

5  
6 55 **Objective:** Subsequent protection from severe acute respiratory syndrome-related coronavirus 2  
7  
8  
9 56 (SARS-COV-2) infection in pediatrics is not well reported in the literature. We aimed to describe  
10  
11 57 the clinical characteristics and dynamics of SARS-CoV-2 PCR repositivity in children.

12  
13 58 **Design:** This is a population-level retrospective cohort study

14  
15  
16 59 **Setting:** Patients were identified through multiple national-level electronic coronavirus disease  
17  
18 60 2019 (COVID-19) databases that covers all primary, secondary and tertiary centers in Kuwait.

19  
20 61 **Participants:** The study included children 12 years and younger between February 28, 2020 and  
21  
22  
23 62 March 6, 2021. SARS-CoV-2 reinfection was defined as having two or more positive SARS-CoV-2  
24  
25 63 PCR done on a respiratory sample, at least 45 days apart. Clinical data was obtained from the  
26  
27 64 Pediatric COVID-19 Registry in Kuwait (PCR-Q8).

28  
29  
30 65 **Primary and secondary outcome measures:** The primary measure is to estimate SARS-CoV-2  
31  
32 66 PCR repositivity rate. The secondary objective was to establish average duration between first and  
33  
34 67 subsequent SARS-CoV-2 infection. Descriptive statistics was used to present clinical data for each  
35  
36 68 infection episode. Also, incidence-sensitivity analysis was performed to evaluate 60- and 90-day  
37  
38 69 PCR repositivity intervals.

39  
40  
41 70 **Results:** Thirty pediatric COVID-19 patients had SARS-CoV-2 reinfection at an incidence of 1.02  
42  
43 71 (95% CI 0.71-1.45) infection per 100,000 person-days and a median time to reinfection of 83 days  
44  
45 72 (IQR 62-128.75). The incidence of reinfection decreased to 0.78 (95% CI 0.52-1.17) and 0.47 (95%  
46  
47 73 CI 0.28-0.79) per person-days when the minimum interval between PCR repositivity was increased  
48  
49 74 to 60 and 90 days, respectively. The mean age of reinfected subjects was 8.5 years (IQR 3.7-10.3)  
50  
51 75 and the majority (70%) were females. Most children (55.2%) had asymptomatic reinfection. Fever  
52  
53 76 was the most common presentation in symptomatic patients. One immunocompromised  
54  
55 77 experienced two reinfection episodes.  
56  
57  
58  
59  
60 78

1  
2 79 **Conclusion:** SARS-CoV-2 reinfection is uncommon in children. Previous confirmed COVID-19 in  
3  
4 80 children seems to result in a milder reinfection.

5  
6  
7 81

8  
9  
10 82 **Data availability statement:**

11  
12 83 No additional data available.

13  
14  
15 84

16  
17 85 **Strength and limitations of the study**

- 18  
19 86 - This study used a national-level electronic database that included all SARS-CoV-2 test  
20  
21 results that allowed data collection from variable sources and the detection of  
22 87 asymptotically infected children.  
23  
24 88 - The exact risk for SARS-CoV-2 reinfection is difficult to estimate as children are more  
25  
26 89 likely to be asymptomatic, therefore not all positive cases are detected.  
27  
28 90 - Factors contributing to reinfection such as the circulating variants, and the degree of  
29  
30 91 community SARS- CoV-2 transmission were not addressed in this study.  
31  
32 92 - Patients' symptoms and severity in this retrospective analysis were dependent on the  
33  
34 93 accuracy of reporting in medical notes and parental recall of symptoms.  
35  
36 94 - Due to limited genomic sequencing capacity, proving the direct causality between PCR  
37  
38 95 repositivity and a genetically distinct virus was not possible.  
39  
40 96  
41  
42  
43  
44  
45 97

1  
2 98 **Introduction:**

3  
4 99 Severe acute respiratory syndrome-related coronavirus 2 (SARS-CoV-2) is a  
5  
6 100 novel beta coronavirus that was first described in December 2019 and resulted in a pandemic of  
7  
8  
9 101 respiratory illness, coronavirus disease-2019 (COVID-19) <sup>1</sup>. By early May 2021, the pandemic has  
10  
11 102 resulted in over 150 million cases worldwide and more than three million deaths reported by the  
12  
13 103 World Health Organization (WHO)<sup>2</sup>. Despite the widespread of COVID-19, children compromised  
14  
15  
16 104 less than 15% of all reported cases <sup>3-5</sup>. Limited social interactions, and enhanced infection control  
17  
18 105 measures such as school closure and online teaching, may have contributed to lower proportions of  
19  
20 106 infected children <sup>6</sup>. In addition, children are more likely to have asymptomatic or mild infection  
21  
22  
23 107 compared to adults and, therefore, may not be tested <sup>7</sup>.

24  
25 108  
26  
27 109 Quantifying the duration of natural immunity after the primary SARS-CoV-2 infection has  
28  
29  
30 110 been crucial to address public health measures, to help predict the continuity of the pandemic, and  
31  
32 111 to understand the effect of reinfection on disease severity. The first case of SARS-CoV-2  
33  
34 112 reinfection was reported in August 2020 <sup>8</sup>. Since then, interest in the exact risk and rate of  
35  
36 113 reinfection has been increasing. Several reports estimated that reinfection occurs in less than 1% of  
37  
38  
39 114 previously infected individuals <sup>9-11</sup>. The duration between primary and secondary infection was  
40  
41 115 reported to vary from 48 to 124 days in the first documented cases in literature <sup>12, 13</sup>. However, most  
42  
43 116 of the reinfection studies focused mainly on the adult population. COVID-19 follows different  
44  
45  
46 117 disease dynamics in children, and studies addressing reinfection in this population are lacking/or  
47  
48 118 limited.

49  
50 119  
51  
52 120 The first pediatric case of COVID-19 in Kuwait was identified in February 2020 <sup>7</sup>. Since  
53  
54  
55 121 then, schools and daycare centers were closed, and classes were conducted virtually. In addition,  
56  
57 122 commercial centers, gyms, and restaurants were open but with time restrictions and strict protective  
58  
59  
60 123 measures. Early in the pandemic, a national electronic COVID-19 testing database was created and

1  
2 124 included all SARS-CoV-2 test results of symptomatic individuals, contact tracing, and routine  
3  
4 125 travel or hospitalization screening. Also, a national Pediatric COVID-19 Registry (PCR-Q8) was  
5  
6 126 established for children aged 12 years and younger to better understand disease dynamics and  
7  
8  
9 127 update management protocols. This created the unique opportunity to investigate the possibility of  
10  
11 128 reinfection with SARS-CoV-2, with an attempt to establish an average duration between the two  
12  
13 129 positive results, potential factors linked to reinfection, and its clinical severity.  
14  
15  
16 130  
17  
18 131

## 20 132 **Methods:**

22  
23 133 A population-level retrospective cohort study was conducted in Kuwait between February  
24  
25 134 28<sup>th</sup>, 2020, and March 6<sup>th</sup>, 2021. The national COVID-19 test result database was used to identify  
26  
27 135 children younger than 12 years and had two or more subsequent positive SARS-CoV-2 polymerase  
28  
29  
30 136 chain reaction (PCR) tests done on a respiratory sample, at least 45 days apart. Subjects who had  
31  
32 137 two or more positive SARS-CoV-2 PCR but less than 45 days in-between, and patients who  
33  
34 138 fulfilled the WHO definition of the multisystem inflammatory syndrome in children (MIS-C) were  
35  
36 139 excluded <sup>14</sup>.  
37  
38  
39 140  
40

41 141 To assure the inclusion of all SARS-CoV-2 infected children into this study, the national  
42  
43 142 COVID-19 testing database was used for initial patient identification. This database includes the  
44  
45  
46 143 results for all individuals who had SARS-CoV-2 PCR done on a respiratory specimen nationwide.  
47  
48 144 SARS-CoV-2 PCR is typically done to confirm the diagnosis of symptomatic individuals, detect  
49  
50 145 secondary infections in contact tracing, and identify infected subjects prior to hospitalization or  
51  
52  
53 146 travel. During the study period, the SARS-CoV-2 antigen was not routinely performed on pediatric  
54  
55 147 samples. Also, serum SARS-CoV-2 IgG or IgM tests were not routinely done to confirm current or  
56  
57 148 prior infection. A secondary search query was done on the PCR-Q8 registry, which included patient  
58  
59  
60

1  
2 149 information from the following sources: hospital records, institutional quarantine centers, patient  
3  
4 150 transport units, as well as all laboratories that provide SARS-CoV-2 PCR.  
5

6 151  
7  
8  
9 152 The PCR-Q8 registry retrospectively collected detailed individual-level demographic,  
10  
11 153 laboratory and clinical characteristics of all children diagnosed with COVID-19 in Kuwait. The  
12  
13 154 database was acquired to obtain demographic and clinical data. COVID-19 severity was categorized  
14  
15  
16 155 based on WHO disease classification<sup>15</sup>. Infected children with mild or asymptomatic COVID-19  
17  
18 156 may not require hospitalization. Therefore, clinical data in the registry may be lacking/or limited.  
19  
20 157 For those subjected, parents were contacted to complete missing disease-related data.  
21  
22

23 158  
24  
25 159 Descriptive analysis was performed to compare between primary and secondary infections.  
26  
27 160 To calculate incidence and to account for delayed presentation of reinfection, calculated days at risk  
28  
29  
30 161 included the period from the day of first positive SARS-CoV-2 PCR starting February 28<sup>th</sup>, 2020 to  
31  
32 162 the second positive test or March 6<sup>th</sup>, 2021, whichever is first. However, individuals with the first  
33  
34 163 positive SARS-CoV-2 PCR starting January 1<sup>st</sup>, 2021, were not included in the calculation due to  
35  
36 164 limited time for reinfection to occur. Clopper-Pearson test was used to calculate the 95% CI.  
37  
38  
39 165 Analysis was done using GraphPad Prism (v. 9.0). Due to the variability in established reinfection  
40  
41 166 case definition, sensitivity analysis assessing the clinical presentation and incidence of reinfection  
42  
43 167 considering a minimum interval for PCR repositivity of 60 and 90 days<sup>16</sup>.  
44  
45

46 168

#### 48 169 **Patient and public involvement statement:**

49  
50 170 Patients were not included in the design, reporting, or dissemination plans of our research.  
51  
52  
53 171 However, parents of children with PCR repositivity were contacted to complete missing data. This  
54  
55 172 study was conducted to address epidemiological questions presented by the Pediatric COVID-19  
56  
57 173 Task Force (Ministry of Health, Kuwait). The initial concept and study plan was presented to the  
58  
59 174 committee members, whose suggestions and comments were considered in the final study protocol  
60



1  
2  
3  
4  
5  
6  
7  
8  
9  
10  
11  
12  
13  
14  
15  
16  
17  
18  
19  
20  
21  
22  
23  
24  
25  
26  
27  
28  
29  
30  
31  
32  
33  
34  
35  
36  
37  
38  
39  
40  
41  
42  
43  
44  
45  
46  
47  
48  
49  
50  
51  
52  
53  
54  
55  
56  
57  
58  
59  
60

175  
176

**Ethics:**

The study was approved by the ethical board of the Ministry of Health, Kuwait (reference no. 1607/2020). Verbal consent was obtained from parents who agreed to participate to complete missing clinical data.

For peer review only

1  
2 182 **Results**

3  
4 183 During the study period, there were 14,320 documented SARS-CoV-2 infections in children  
5  
6 184 younger than 12 years in Kuwait, accounting for 2,954,372 person-days of follow-up. Among those,  
7  
8 185 421 children with repeat positive SARS-CoV-2 PCR were identified, of which, 30 patients had a  
9  
10 186 repeat positive SARS-CoV-2 45 days or more after the first positive, 391 patients had their repeat  
11  
12 187 test within 45 days and were excluded (figure 1). The incidence of reinfection was 1.02 (95% CI  
13  
14 188 0.71-1.45) infection per 100,000 previously infected person-days. The mean age of the reinfection  
15  
16 189 cohort was 8.5 (IQR 3.7-10.3) years and majority (70%) were females (table 1). More than half  
17  
18 190 (56.6%) of reinfection patients were not known to have any chronic comorbid conditions at the time  
19  
20 191 of the first or second infection.  
21  
22  
23  
24  
25 192

26  
27 193 The median time between the two episodes of infection as evident by the sample collection  
28  
29 194 date was 83 days (IQR 62-128.75 days) (figure 2). Majority of the patients had asymptomatic  
30  
31 195 infection during the first and second episodes, 43.3% and 53.3% respectively (table 2). In  
32  
33 196 symptomatic patients, fever, cough and shortness of breath were the most commonly reported  
34  
35 197 symptoms. One (3.3%) patient had severe pneumonia during the first infection, whereas, four  
36  
37 198 (13.3%) patients had severe pneumonia during second infection. Of those, three patients had mild or  
38  
39 199 asymptomatic initial SARS-CoV-2 infection. One of the four patients was admitted for an acute  
40  
41 200 exacerbation of asthma with three days history of fever. The median length of hospitalization was 9  
42  
43 201 days (IQR 5.75-13 days) and 6 days (IQR 3.75-6.75 days) for the first and second infection,  
44  
45  
46 202 respectively. None of the subjects received care in an intensive care unit.  
47  
48  
49  
50 203

51  
52 204 One female patient previously diagnosed with hypereosinophilic syndrome on low-dose  
53  
54 205 prednisone, had three episodes of SARS-CoV-2 infections. Her first infection was in July 2020  
55  
56 206 where she was admitted for 10 days as a case of severe pneumonia followed by two negative PCR  
57  
58 207 tests done in August. Her second infection was in November 2020 when she was also admitted for  
59  
60

1  
2 208 severe pneumonia with prolonged hospital admission followed by a negative PCR test done in  
3  
4 209 December. Interestingly, during her third infection in January 2021, she was asymptomatic and  
5  
6 210 testing was done for screening before an outpatient appointment.  
7  
8

9 211  
10  
11 212           Around half (46.6%) of reinfections occurred more than 90 days after the initial infection.  
12  
13 213 The incidence of reinfection decreased to 0.78 (95% CI 0.52-1.17) and 0.47 (95% CI 0.28-0.79) per  
14  
15 214 infected person-days when the minimum acceptable duration between PCR repositivity was  
16  
17  
18 215 increased to 60 and 90 days, respectively. Also, there were more symptomatic children (64.3%)  
19  
20 216 during the second infection using the 90-day definition when compared to the 45-day or 60-day  
21  
22  
23 217 minimum interval.  
24  
25 218  
26  
27 219  
28  
29  
30  
31  
32  
33  
34  
35  
36  
37  
38  
39  
40  
41  
42  
43  
44  
45  
46  
47  
48  
49  
50  
51  
52  
53  
54  
55  
56  
57  
58  
59  
60

1  
2 220 **Discussion**

3  
4 221

5  
6 222 The exact risk and factors associated with SARS-CoV-2 reinfection in the pediatric population  
7  
8  
9 223 are still not well understood. We found that a second SARS-CoV-2 infection is uncommon in  
10  
11 224 children with a rate of 1.02 reinfection per 100,000 previously infected person-days and a median  
12  
13 225 time to reinfection of 83 days. The finding of this study is similar to previous reports, which showed  
14  
15 226 a reinfection incidence in adults of 0.9-1.3 per 100,000 person-day<sup>9,11</sup>. Similarly, in a large Danish  
16  
17 227 cohort, prior SARS-CoV-2 provided on average 80.5% protection against repeat infection. The  
18  
19 228 estimated protection differed between different age groups ranging from 47.1% in individuals older  
20  
21 229 than 65 years of age to 82.7% in younger subjects<sup>17</sup>. However, the epidemiology and disease  
22  
23 230 dynamics of SARS-CoV-2 infection are different in children<sup>18</sup>. Therefore, using data generated  
24  
25 231 from adult studies to infer on the pediatric population may not be accurate.

26  
27 232

28  
29  
30 233 Magnitude and persistence of immunological responses conferred by SARS-CoV-2  
31  
32 234 infection can be variable based on age and medical comorbidities<sup>19</sup>. Hence, estimating the duration  
33  
34 235 of protective immunity after acquiring SARS-CoV-2 infection has been the focus of several studies.  
35  
36 236 In an adult study, looking at the neutralizing antibodies, the seropositivity was identified in all  
37  
38 237 participants up to 53 days after infection<sup>20</sup>. However, the level of neutralizing antibodies varies  
39  
40 238 greatly with disease severity and tend to wane over time<sup>21,22</sup>. Few studies compared humoral  
41  
42 239 responses between adults and children. Weisberg et. al. have shown that children exhibit lower  
43  
44 240 antibody response compared to adults<sup>23</sup>. However, the incidence of reinfections observed in this  
45  
46 241 study was similar to previously reported adult patients.

47  
48 242

49  
50 243 A standard definition of SARS-CoV-2 reinfection is lacking. Traditionally, the detection of  
51  
52 244 viable virus by cell culture has been the standard to ascertain active infection<sup>24</sup>. However, this  
53  
54 245 testing method lacks sensitivity and is time consuming<sup>25</sup>. In addition, due to the need of expertise

1  
2 246 and appropriate laboratory infrastructure, routine population-level testing using cell culture in not  
3  
4 247 possible. For these reasons, the detection of genetically distinct SARS-CoV-2 in different infectious  
5  
6 248 episodes or the use of the cycle threshold (Ct) value as a surrogate for viral load has been suggested  
7  
8  
9 249 <sup>12, 13</sup>. In Kuwait, genomic testing capacity is limited and retrieving patients' samples and laboratory  
10  
11 250 data from several public and private laboratories was logistically challenging. In our study, a 45-day  
12  
13 251 period between two-consecutive positive PCR test was selected based on established definition in  
14  
15  
16 252 previously published studies and the expected duration of molecular test positivity on a respiratory  
17  
18 253 sample <sup>26-29</sup>. Alsharrah et al. reported a median duration of PCR positivity among pediatric COVID-  
19  
20 254 19 patients of 15 days, with maximum duration of 42 days <sup>7</sup>. However, we observed a decline in the  
21  
22  
23 255 rate of repositivity from 1.02 to 0.47 per 100,000 previously infected person-days when the  
24  
25 256 definition of PCR-repositivity increased from 45 to 90 days. As almost half of cases are  
26  
27 257 asymptomatic, this finding could be due to persistent detection of viral particles by PCR.  
28  
29  
30 258

31  
32 259 Asymptomatic SARS-CoV-2 infection is common in pediatrics. We found that around half  
33  
34 260 of infections (43.3% in initial infection and 55.2% in reinfection) remained asymptomatic on  
35  
36 261 follow-up. This finding is similar to other studies <sup>30</sup>. High proportion of silent infection may pose an  
37  
38  
39 262 important public health concern and limit the effectiveness of transmission mitigation efforts. Also,  
40  
41 263 the possibility of reinfection within a relatively short period of time as observed in this study may  
42  
43 264 be an overlooked source of community transmission. Further epidemiological studies are needed to  
44  
45  
46 265 assess the risk of transmission in patients with PCR repositivity within 90 days. Real-world  
47  
48 266 COVID-19 vaccine effectiveness data showed that reinfection is more common in unvaccinated  
49  
50 267 adults<sup>31</sup>. These findings support the recommendation to offer vaccination to those previously  
51  
52  
53 268 infected.

54  
55 269  
56  
57 270 To our knowledge, this is the first national-level cohort that estimates the risk of pediatric  
58  
59 271 SARS-CoV-2 reinfection. Nevertheless, this study has some limitations. Due to limited genomic

1  
2 272 sequencing capacity, proving that PCR repositivity was caused by a genetically distinct virus was  
3  
4 273 not possible. However, based on the expected duration of PCR-persistence in children mentioned  
5  
6 274 above, one will not expect that PCR done on an upper respiratory specimen to remain positive  
7  
8  
9 275 beyond 45 days. Also, the effect of different SARS-CoV-2 variants on the risk of reinfection was  
10  
11 276 difficult to assess. Another limitation was the unavailability of some data recorded in the national  
12  
13 277 pediatric COVID-19 registry. When data was missing, parents were contacted via the telephone,  
14  
15  
16 278 creating a recall bias. In addition, patients with mild upper respiratory tracts symptoms are  
17  
18 279 underreported by parents. Therefore, mild cases are less likely to be tested and can be missed, and  
19  
20 280 underestimate the reinfection rate. However, using the national level electronic record allowed the  
21  
22  
23 281 collection of data from variable sources and the detection of asymptotically infected children.  
24  
25 282 Lastly, the exact incidence of reinfection is dependent on several factors that may be difficult to  
26  
27 283 control in cohort studies and may affect data generalizability. These factors include rate SARS-  
28  
29  
30 284 CoV-2 transmission in the community, and preexisting population immunity. However, the effect of  
31  
32 285 existing immunity is limited in our cohort as it included pediatric patients that were followed from  
33  
34 286 the start of the pandemic. Despite these limitations, this study has shown that reinfection is  
35  
36 287 generally uncommon. Further studies that correlate degree of humoral and cellular immunity, along  
37  
38  
39 288 with wide genomic sequencing surveillance with risk of reinfection are needed to better understand  
40  
41 289 and quantify the risk of repeat SARS-CoV-2 infection.  
42  
43 290

44

45

46

47

48

49

50

51

52

53

54

55

56

57

58

59

60

1  
2 291 **Acknowledgement:**  
3

4 292 We would like to thank Dr. Hessa Alkandari, chair of the pediatric council in the Ministry of

5  
6 293 Health, Kuwait, for her help in preparing this manuscript. We also thank the research group of the

7  
8  
9 294 Pediatric COVID-19 Registry in Kuwait (PCR-Q8) for their contribution.  
10  
11 295  
12  
13  
14  
15  
16  
17  
18  
19  
20  
21  
22  
23  
24  
25  
26  
27  
28  
29  
30  
31  
32  
33  
34  
35  
36  
37  
38  
39  
40  
41  
42  
43  
44  
45  
46  
47  
48  
49  
50  
51  
52  
53  
54  
55  
56  
57  
58  
59  
60

For peer review only

1  
2 296 **Table 1.** Demographic characteristics of the study population

3  
4 297

5

| Variable                                                    | Population           |
|-------------------------------------------------------------|----------------------|
|                                                             | (n=30)               |
| <b>Age</b> [median, IQR]                                    | 8.6 years [3.7-10.3] |
| <b>Male</b>                                                 | 9 (30%)              |
| <b>Comorbid conditions</b>                                  |                      |
| Asthma                                                      | 2 (6.7%)             |
| Diabetes                                                    | 1 (3.3%)             |
| Healthy                                                     | 17 (56.7%)           |
| Neurological disease                                        | 3 (10%)              |
| Other                                                       | 5 (16.7%)            |
| Preterm                                                     | 1 (3.3%)             |
| <b>Time between 2 episodes</b>                              |                      |
| First positive PCR to reinfection [median, IQR]             | 83 days [62-128.75]  |
| Symptom onset of first episode to reinfection [median, IQR] | 83 days [62.5-130.5] |

6 298 IQR, interquartile range.

7  
8  
9  
10  
11  
12  
13  
14  
15  
16  
17  
18  
19  
20  
21  
22  
23  
24  
25  
26  
27  
28  
29  
30  
31  
32  
33  
34  
35  
36  
37  
38  
39  
40  
41  
42  
43  
44  
45  
46  
47  
48  
49  
50  
51  
52  
53  
54  
55  
56  
57  
58  
59  
60



**Table 2.** Clinical characteristics of the study population based on different defined intervals of polymerase chain reaction (PCR) repositivity

| Variable                                | First Infection                      |                   |                   | Second Infection                     |                   |                   |
|-----------------------------------------|--------------------------------------|-------------------|-------------------|--------------------------------------|-------------------|-------------------|
|                                         | Minimum interval of PCR repositivity |                   |                   | Minimum interval of PCR repositivity |                   |                   |
|                                         | 45 days<br>(n=30)                    | 60 days<br>(n=23) | 90 days<br>(n=14) | 45 days<br>(n=29)*                   | 60 days<br>(n=23) | 90 days<br>(n=14) |
| <b>Disease severity</b>                 |                                      |                   |                   |                                      |                   |                   |
| Asymptomatic                            | 13 (43.3%)                           | 12 (52.2%)        | 8 (57.1%)         | 16 (55.2%)                           | 12 (52.2%)        | 5 (35.7%)         |
| Mild illness                            | 15 (33.3%)                           | 9 (39.1%)         | 4 (28.6%)         | 9 (31%)                              | 7 (30.4%)         | 5 (35.7%)         |
| Mild pneumonia                          | 1 (3.3%)                             | 1 (4.3%)          | 1 (7.1%)          | 0                                    | 0                 | 0                 |
| Severe pneumonia                        | 1 (3.3%)                             | 1 (4.3%)          | 1 (7.1%)          | 4 (13.8%)                            | 4 (17.4%)         | 4 (28.6%)         |
| <b>Reason for testing</b>               |                                      |                   |                   |                                      |                   |                   |
| Close contact testing                   | 13 (43.3%)                           | 12 (52.2%)        | 8 (57.1%)         | 6 (20.7%)                            | 5 (21.7%)         | 4 (28.6%)         |
| Hospitalization screening               | 5 (16.7%)                            | 4 (17.4%)         | 3 (21.4%)         | 7 (24.1%)                            | 6 (26.1%)         | 5 (35.7%)         |
| Suspected COVID-19                      | 12 (40%)                             | 7 (30.4%)         | 3 (21.4%)         | 6 (20.7%)                            | 5 (21.7%)         | 4 (28.6%)         |
| Travel screening                        | 1 (3.3%)                             | 0                 | 0                 | 10 (34.5%)                           | 7 (30.4%)         | 1 (7.1%)          |
| <b>Symptoms</b>                         |                                      |                   |                   |                                      |                   |                   |
| Abdominal pain                          | 2 (4%)                               | 1 (3.1%)          | 1 (5%)            | 0                                    | 0                 | 0                 |
| cough                                   | 4 (8.2%)                             | 4 (12.5%)         | 3 (15%)           | 8 (20.5%)                            | 8 (21.6%)         | 7 (21.9%)         |
| Diarrhea                                | 2 (4%)                               | 2 (6.3%)          | 2 (10%)           | 0                                    | 0                 | 0                 |
| Fever                                   | 16 (32.6%)                           | 11 (34.4%)        | 6 (30%)           | 12 (30.8%)                           | 10 (27%)          | 8 (25%)           |
| Headache                                | 2 (4%)                               | 2 (6.3%)          | 1 (5%)            | 1 (2.6%)                             | 1 (2.7%)          | 1 (3.1%)          |
| Loss of smell                           | 4 (8.2%)                             | 1 (3.1%)          | 0                 | 1 (2.6%)                             | 1 (2.7%)          | 1 (3.1%)          |
| Loss of taste                           | 4 (8.2%)                             | 1 (3.1%)          | 0                 | 1 (2.6%)                             | 1 (2.7%)          | 1 (3.1%)          |
| Myalgia                                 | 4 (8.2%)                             | 3 (9.4%)          | 3 (15%)           | 1 (2.6%)                             | 1 (2.7%)          | 1 (3.1%)          |
| Rhinorrhea                              | 4 (8.2%)                             | 3 (9.4%)          | 1 (5%)            | 8 (20.5%)                            | 8 (21.6%)         | 7 (21.9%)         |
| Shortness of breath                     | 3 (6.1%)                             | 2 (6.3%)          | 2 (10%)           | 3 (7.7%)                             | 3 (8.1%)          | 3 (9.4%)          |
| Sore throat                             | 3 (6.1%)                             | 2 (6.3%)          | 1 (5%)            | 3 (7.7%)                             | 3 (8.1%)          | 2 (6.3%)          |
| Vomiting                                | 1 (2%)                               | 0                 | 0                 | 1 (2.6%)                             | 1 (2.7%)          | 1 (3.1%)          |
| <b>Hospitalization</b>                  |                                      |                   |                   |                                      |                   |                   |
| Length of stay in days<br>[median, IQR] | 9 [5.75-13]                          | 9 [7.25-11]       | 8 [6.5-9]         | 6 [3-6]                              | 6 [3-6]           | 6 [3-6]           |

IQR, interquartile range.

1  
2 \*clinical data for one patient is missing  
3  
4 299  
5  
6 300  
7  
8 301  
9  
10  
11  
12  
13  
14  
15  
16  
17  
18  
19  
20  
21  
22  
23  
24  
25  
26  
27  
28  
29  
30  
31  
32  
33  
34  
35  
36  
37  
38  
39  
40  
41  
42  
43  
44  
45  
46  
47  
48  
49  
50  
51  
52  
53  
54  
55  
56  
57  
58  
59  
60

For peer review only

1  
2 302 **References:**

- 3 303 1. Samudrala PK, Kumar P, Choudhary K, Thakur N, Wadekar GS, Dayaramani R, et al.  
4 304 Virology, pathogenesis, diagnosis and in-line treatment of COVID-19. *European Journal of*  
5 305 *Pharmacology*. 2020;883:173375.
- 6 306 2. WHO Coronavirus Disease (COVID-19) Dashboard. World Health Organization. World  
7 307 Health Organization. <https://covid19.who.int/>. Published May 1, 2021. Accessed May 1,  
8 308 2021.
- 9 309 3. Leidman E, Duca LM, Omura JD, Proia K, Stephens JW, Sauber-Schatz EK. COVID-19  
10 310 Trends Among Persons Aged 0-24 Years - United States, March 1-December 12, 2020.  
11 311 *MMWR Morbidity and mortality weekly report*. 2021;70(3):88-94.
- 12 312 4. Children and COVID-19: State Data Report. American Academy of Pediatrics and the  
13 313 Children's Hospital Association. [https://services.aap.org/en/pages/2019-novel-coronavirus-](https://services.aap.org/en/pages/2019-novel-coronavirus-covid-19-infections/children-and-covid-19-state-level-data-report/)  
14 314 [covid-19-infections/children-and-covid-19-state-level-data-report/](https://services.aap.org/en/pages/2019-novel-coronavirus-covid-19-infections/children-and-covid-19-state-level-data-report/). Published May 10, 2020.  
15 315 Accessed May 12, 2021.
- 16 316 5. CDC Covid-Response Team. Coronavirus Disease 2019 in Children - United States,  
17 317 February 12-April 2, 2020. *MMWR Morbidity and mortality weekly report*.  
18 318 2020;69(14):422-426.
- 19 319 6. Lee P-I, Hu Y-L, Chen P-Y, Huang Y-C, Hsueh P-R. Are children less susceptible to  
20 320 COVID-19? *Journal of microbiology, immunology, and infection = Wei mian yu gan ran za*  
21 321 *zhi*. 2020;53(3):371-372.
- 22 322 7. Alsharrah DY, Al-Haddad F, Aljamaan S, Al-Yaseen M, Al-Mutairi N, Ayed M, et al. 441.  
23 323 Clinical Characteristics of Pediatric SARS-CoV-2 Infection and Coronavirus Disease 2019  
24 324 (COVID-19) in Kuwait. *Open Forum Infectious Diseases*; 2020: Oxford University Press  
25 325 US. p. S288-S288.
- 26 326 8. Parry J. Covid-19: Hong Kong scientists report first confirmed case of reinfection. British  
27 327 Medical Journal Publishing Group; 2020.
- 28 328 9. Abu-Raddad LJ, Chemaitelly H, Coyle P, Malek JA, Ahmed AA, Mohamoud YA, et al.  
29 329 SARS-CoV-2 reinfection in a cohort of 43,000 antibody-positive individuals followed for  
30 330 up to 35 weeks. *medRxiv*. 2021.
- 31 331 10. Lumley SF, O'Donnell D, Stoesser NE, Matthews PC, Howarth A, Hatch SB, et al.  
32 332 Antibody status and incidence of SARS-CoV-2 infection in health care workers. *New*  
33 333 *England Journal of Medicine*. 2021;384(6):533-540.
- 34 334 11. Hall VJ, Foulkes S, Charlett A, Atti A, Monk EJ, Simmons R, et al. Do antibody positive  
35 335 healthcare workers have lower SARS-CoV-2 infection rates than antibody negative  
36 336 healthcare workers? Large multi-centre prospective cohort study (the SIREN study),  
37 337 England: June to November 2020. *medRxiv*. 2020:2021.2001.2013.21249642.
- 38 338 12. European Centre for Disease Prevention and Control. Reinfection with SARS-CoV:  
39 339 considerations for public health response. [https://www.ecdc.europa.eu/en/publications-](https://www.ecdc.europa.eu/en/publications-data/threat-assessment-brief-reinfection-sars-cov-2#copy-to-clipboard)  
40 340 [data/threat-assessment-brief-reinfection-sars-cov-2#copy-to-clipboard](https://www.ecdc.europa.eu/en/publications-data/threat-assessment-brief-reinfection-sars-cov-2#copy-to-clipboard). Published Sept 21,  
41 341 2020. Accessed April 15, 2021.
- 42 342 13. Pan American Health Organization/ World Health Organization. Interim guidelines for  
43 343 detecting cases of reinfection by SARS-CoV-2.  
44 344 [https://www.paho.org/en/documents/interim-guidelines-detecting-cases-reinfection-sars-](https://www.paho.org/en/documents/interim-guidelines-detecting-cases-reinfection-sars-cov-2)  
45 345 [cov-2](https://www.paho.org/en/documents/interim-guidelines-detecting-cases-reinfection-sars-cov-2). Published Oct 29, 2020. Accessed April 15, 2021.
- 46 346 14. Multisystem inflammatory syndrome in children and adolescents with COVID-19. World  
47 347 Health Organization. [https://www.who.int/publications/i/item/multisystem-inflammatory-](https://www.who.int/publications/i/item/multisystem-inflammatory-syndrome-in-children-and-adolescents-with-covid-19)  
48 348 [syndrome-in-children-and-adolescents-with-covid-19](https://www.who.int/publications/i/item/multisystem-inflammatory-syndrome-in-children-and-adolescents-with-covid-19). Published May 15, 2020. April 10,  
49 349 2021.
- 50 350 15. WHO. Clinical management of severe acute respiratory infection (SARI) when COVID-19  
51 351 disease is suspected: interim guidance, 13 March 2020: World Health Organization; 2020.
- 52 352 16. European Centre for Disease Prevention and Control. Reinfection with SARS-CoV-2:  
53 353 implementation of a surveillance case definition within the EU/EEA.

- 1  
2 354 [https://www.ecdc.europa.eu/en/publications-data/reinfection-sars-cov-2-implementation-](https://www.ecdc.europa.eu/en/publications-data/reinfection-sars-cov-2-implementation-surveillance-case-definition-within-eueea)  
3 355 [surveillance-case-definition-within-eueea](https://www.ecdc.europa.eu/en/publications-data/reinfection-sars-cov-2-implementation-surveillance-case-definition-within-eueea). Published 8 April 2021.
- 4 356 17. Hansen CH, Michlmayr D, Gubbels SM, Mølbak K, Ethelberg S. Assessment of protection  
5 357 against reinfection with SARS-CoV-2 among 4 million PCR-tested individuals in Denmark  
6 358 in 2020: a population-level observational study. *The Lancet*. 2021.
- 8 359 18. Dong Y, Mo X, Hu Y, Qi X, Jiang F, Jiang Z, et al. Epidemiological characteristics of 2143  
9 360 pediatric patients with 2019 coronavirus disease in China. *Pediatrics*. 2020.
- 10 361 19. Bajaj V, Gadi N, Spihlman AP, Wu SC, Choi CH, Moulton VR. Aging, Immunity, and  
11 362 COVID-19: How Age Influences the Host Immune Response to Coronavirus Infections?  
12 363 *Front Physiol*. 2020;11:571416.
- 13 364 20. Wang X, Guo X, Xin Q, Pan Y, Hu Y, Li J, et al. Neutralizing antibody responses to severe  
14 365 acute respiratory syndrome coronavirus 2 in coronavirus disease 2019 inpatients and  
15 366 convalescent patients. *Clinical Infectious Diseases*. 2020;71(10):2688-2694.
- 17 367 21. Chia WN, Zhu F, Ong SWX, Young BE, Fong S-W, Le Bert N, et al. Dynamics of SARS-  
18 368 CoV-2 neutralising antibody responses and duration of immunity: a longitudinal study. *The*  
19 369 *Lancet Microbe*.
- 20 370 22. Lau EHY, Tsang OTY, Hui DSC, Kwan MYW, Chan WH, Chiu SS, et al. Neutralizing  
21 371 antibody titres in SARS-CoV-2 infections. *Nat Commun*. 2021;12(1):63.
- 23 372 23. Weisberg SP, Connors TJ, Zhu Y, Baldwin MR, Lin W-H, Wontakal S, et al. Distinct  
24 373 antibody responses to SARS-CoV-2 in children and adults across the COVID-19 clinical  
25 374 spectrum. *Nature immunology*. 2021;22(1):25-31.
- 26 375 24. Hodinka RL, Kaiser L, Hodinka RL, Kaiser L. Point-Counterpoint: Is the Era of Viral  
27 376 Culture Over in the Clinical Microbiology Laboratory? *Journal of Clinical Microbiology*.  
28 377 2013;51(1):2-8.
- 30 378 25. AlGhounaim M, Xiao Y, Caya C, Papenburg J. Diagnostic yield and clinical impact of  
31 379 routine cell culture for respiratory viruses among children with a negative multiplex RT-  
32 380 PCR result. *J Clin Virol*. 2017;94:107-109.
- 33 381 26. Abu-Raddad LJ, Chemaitelly H, Malek JA, Ahmed AA, Mohamoud YA, Younuskunju S, et  
34 382 al. Assessment of the Risk of Severe Acute Respiratory Syndrome Coronavirus 2 (SARS-  
35 383 CoV-2) Reinfection in an Intense Reexposure Setting. *Clin Infect Dis*. 2021;73(7):e1830-  
36 384 e1840.
- 37 385 27. Cohen JI, Burbelo PD. Reinfection With SARS-CoV-2: Implications for Vaccines. *Clin*  
38 386 *Infect Dis*. 2021;73(11):e4223-e4228.
- 40 387 28. Sethuraman N, Jeremiah SS, Ryo A. Interpreting Diagnostic Tests for SARS-CoV-2. *JAMA*.  
41 388 2020;323(22):2249-2251.
- 42 389 29. Wajnberg A, Mansour M, Leven E, Bouvier NM, Patel G, Firpo-Betancourt A, et al.  
43 390 Humoral response and PCR positivity in patients with COVID-19 in the New York City  
44 391 region, USA: an observational study. *Lancet Microbe*. 2020;1(7):e283-e289.
- 46 392 30. He J, Guo Y, Mao R, Zhang J. Proportion of asymptomatic coronavirus disease 2019: A  
47 393 systematic review and meta-analysis. *J Med Virol*. 2021;93(2):820-830.
- 48 394 31. Pouwels KB, Pritchard E, Matthews PC, Stoesser N, Eyre DW, Vihta KD, et al. Effect of  
49 395 Delta variant on viral burden and vaccine effectiveness against new SARS-CoV-2 infections  
50 396 in the UK. *Nat Med*. 2021;27(12):2127-2135.

51 397  
52 398  
53 399  
54 400  
55 401 **Table 1.** Demographic characteristics of the study population.

57  
58 402 **Table 2.** Clinical characteristics of the study population based on different defined intervals of  
59  
60 403 polymerase chain reaction (PCR) repositivity.

1

2 404 **Figure 1:** Flow diagram of the study population

3

4 405 **Figure 2:** Duration between first SARS-CoV-2 infection and subsequent infections. The shaded

5

6 406 bars represent the duration between positive PCR results.

8

9 407

10

11 408

12

13 409

14

15 410

16

17 411

18

19

20

21

22

23

24

25

26

27

28

29

30

31

32

33

34

35

36

37

38

39

40

41

42

43

44

45

46

47

48

49

50

51

52

53

54

55

56

57

58

59

60

For peer review only

1  
2  
3 **Figure 1:** Flow diagram of the study population  
4  
5  
6  
7

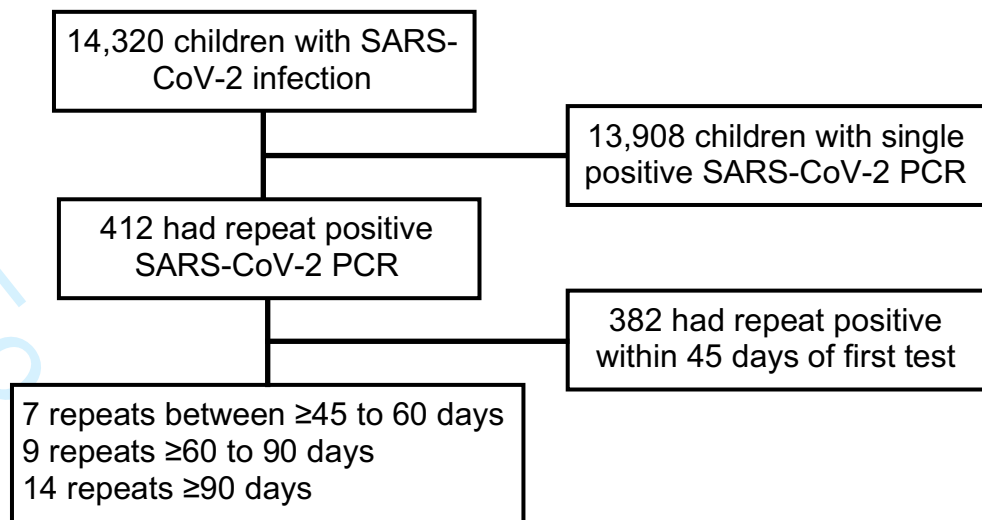

**Figure 2:** Duration between first SARS-CoV-2 infection and subsequent infections. The shaded bars represent the duration between positive PCR results.



\*Patient 6 had two episodes of reinfection

## Incidence of Potential SARS-CoV-2 Reinfection in a Pediatric Cohort in Kuwait

STROBE Statement—checklist of items that should be included in reports of observational studies

|                           | Item No | Recommendation                                                                                                                                                                             | Page and line number                               |
|---------------------------|---------|--------------------------------------------------------------------------------------------------------------------------------------------------------------------------------------------|----------------------------------------------------|
| <b>Title and abstract</b> | 1       | (a) Indicate the study's design with a commonly used term in the title or the abstract                                                                                                     | P 1, L 1                                           |
|                           |         | (b) Provide in the abstract an informative and balanced summary of what was done and what was found                                                                                        | P 4                                                |
| <b>Introduction</b>       |         |                                                                                                                                                                                            |                                                    |
| Background/rationale      | 2       | Explain the scientific background and rationale for the investigation being reported                                                                                                       | P 6, L 105-123                                     |
| Objectives                | 3       | State specific objectives, including any prespecified hypotheses                                                                                                                           | P 7, L 132-134                                     |
| <b>Methods</b>            |         |                                                                                                                                                                                            |                                                    |
| Study design              | 4       | Present key elements of study design early in the paper                                                                                                                                    | P 7, L 138                                         |
| Setting                   | 5       | Describe the setting, locations, and relevant dates, including periods of recruitment, exposure, follow-up, and data collection                                                            | Dates: P7, L139<br>Exp: P7, L 146<br>Data: P8, 157 |
| Participants              | 6       | (a) <i>Cohort study</i> —Give the eligibility criteria, and the sources and methods of selection of participants. Describe methods of follow-up                                            | P 7, L138 and P8, L 157                            |
|                           |         | <i>Case-control study</i> —Give the eligibility criteria, and the sources and methods of case ascertainment and control selection. Give the rationale for the choice of cases and controls | Exclusion: P 7, L142                               |
|                           |         | <i>Cross-sectional study</i> —Give the eligibility criteria, and the sources and methods of selection of participants                                                                      |                                                    |
|                           |         | (b) <i>Cohort study</i> —For matched studies, give matching criteria and number of exposed and unexposed                                                                                   | NA                                                 |
|                           |         | <i>Case-control study</i> —For matched studies, give matching criteria and the number of controls per case                                                                                 |                                                    |
| Variables                 | 7       | Clearly define all outcomes, exposures, predictors, potential confounders, and effect modifiers. Give diagnostic criteria, if applicable                                                   | P 7, L 146<br>Outcome: P7, L140                    |
| Data sources/measurement  | 8*      | For each variable of interest, give sources of data and details of methods of assessment (measurement). Describe comparability of assessment methods if there is more than one group       | P8, L157                                           |
| Bias                      | 9       | Describe any efforts to address potential sources of bias                                                                                                                                  | Potential recall bias is mentioned in limitation   |
| Study size                | 10      | Explain how the study size was arrived at                                                                                                                                                  | NA                                                 |
| Quantitative variables    | 11      | Explain how quantitative variables were handled in the analyses. If applicable, describe which groupings were chosen and why                                                               | P 8, L165                                          |
| Statistical methods       | 12      | (a) Describe all statistical methods, including those used to control for confounding                                                                                                      | NA                                                 |
|                           |         | (b) Describe any methods used to examine subgroups and interactions                                                                                                                        | P8, L 170                                          |
|                           |         | (c) Explain how missing data were addressed                                                                                                                                                | NA                                                 |
|                           |         | (d) <i>Cohort study</i> —If applicable, explain how loss to follow-up was addressed                                                                                                        | NA                                                 |
|                           |         | <i>Case-control study</i> —If applicable, explain how matching of cases and controls was addressed                                                                                         |                                                    |
|                           |         | <i>Cross-sectional study</i> —If applicable, describe analytical methods taking account of sampling strategy                                                                               |                                                    |
|                           |         | (e) Describe any sensitivity analyses                                                                                                                                                      | P8, L 170                                          |



| <b>Results</b>           |     |                                                                                                                                                                                                              | <b>Page and line number</b>                                   |
|--------------------------|-----|--------------------------------------------------------------------------------------------------------------------------------------------------------------------------------------------------------------|---------------------------------------------------------------|
| Participants             | 13* | (a) Report numbers of individuals at each stage of study—eg numbers potentially eligible, examined for eligibility, confirmed eligible, included in the study, completing follow-up, and analysed            | P 9, L 183                                                    |
|                          |     | (b) Give reasons for non-participation at each stage                                                                                                                                                         | P 9, L187                                                     |
|                          |     | (c) Consider use of a flow diagram                                                                                                                                                                           | Figure 1                                                      |
| Descriptive data         | 14* | (a) Give characteristics of study participants (eg demographic, clinical, social) and information on exposures and potential confounders                                                                     | P 9, L 193                                                    |
|                          |     | (b) Indicate number of participants with missing data for each variable of interest                                                                                                                          | Table 1-<br>no missing data<br>Table 2 –<br>indicated<br>by * |
|                          |     | (c) <i>Cohort study</i> —Summarise follow-up time (eg, average and total amount)                                                                                                                             | P9, L 184                                                     |
| Outcome data             | 15* | <i>Cohort study</i> —Report numbers of outcome events or summary measures over time                                                                                                                          | P9, L183-<br>190                                              |
|                          |     | <i>Case-control study</i> —Report numbers in each exposure category, or summary measures of exposure                                                                                                         |                                                               |
|                          |     | <i>Cross-sectional study</i> —Report numbers of outcome events or summary measures                                                                                                                           |                                                               |
| Main results             | 16  | (a) Give unadjusted estimates and, if applicable, confounder-adjusted estimates and their precision (eg, 95% confidence interval). Make clear which confounders were adjusted for and why they were included | P9, L187                                                      |
|                          |     | (b) Report category boundaries when continuous variables were categorized                                                                                                                                    | done                                                          |
|                          |     | (c) If relevant, consider translating estimates of relative risk into absolute risk for a meaningful time period                                                                                             | NA                                                            |
| Other analyses           | 17  | Report other analyses done—eg analyses of subgroups and interactions, and sensitivity analyses                                                                                                               | P 10, L213                                                    |
| <b>Discussion</b>        |     |                                                                                                                                                                                                              |                                                               |
| Key results              | 18  | Summarise key results with reference to study objectives                                                                                                                                                     | P11, L 223                                                    |
| Limitations              | 19  | Discuss limitations of the study, taking into account sources of potential bias or imprecision. Discuss both direction and magnitude of any potential bias                                                   | P12, L272                                                     |
| Interpretation           | 20  | Give a cautious overall interpretation of results considering objectives, limitations, multiplicity of analyses, results from similar studies, and other relevant evidence                                   | P11, 234-<br>P12 L269                                         |
| Generalisability         | 21  | Discuss the generalisability (external validity) of the study results                                                                                                                                        | P12, L 280                                                    |
| <b>Other information</b> |     |                                                                                                                                                                                                              |                                                               |
| Funding                  | 22  | Give the source of funding and the role of the funders for the present study and, if applicable, for the original study on which the present article is based                                                | P1, L15                                                       |

\*Give information separately for cases and controls in case-control studies and, if applicable, for exposed and unexposed groups in cohort and cross-sectional studies.

**Note:** An Explanation and Elaboration article discusses each checklist item and gives methodological background and published examples of transparent reporting. The STROBE checklist is best used in conjunction with this article (freely

1  
2  
3  
4  
5  
6  
7  
8  
9  
10  
11  
12  
13  
14  
15  
16  
17  
18  
19  
20  
21  
22  
23  
24  
25  
26  
27  
28  
29  
30  
31  
32  
33  
34  
35  
36  
37  
38  
39  
40  
41  
42  
43  
44  
45  
46  
47  
48  
49  
50  
51  
52  
53  
54  
55  
56  
57  
58  
59  
60

available on the Web sites of PLoS Medicine at <http://www.plosmedicine.org/>, Annals of Internal Medicine at <http://www.annals.org/>, and Epidemiology at <http://www.epidem.com/>). Information on the STROBE Initiative is available at [www.strobe-statement.org](http://www.strobe-statement.org).

For peer review only
